# Supplementary material for: Suicide, other externally caused injuries and cardiovascular death following a cancer diagnosis: study protocol for a nationwide population-based study in Japan (J-SUPPORT 1902)
Source: PubMed Central journal article supplement — BMJ Open. 2019 Jul 4;9(7):e030681. doi: 10.1136/bmjopen-2019-030681 (PMC6615787; doi:10.1136/bmjopen-2019-030681), 2019-07-04
Supplement: bmjopen-2019-030681.draft_revisions.pdf [file bmjopen-2019-030681.draft_revisions.pdf]

# BMJ Open

BMJ Open is committed to open peer review. As part of this commitment we make the peer review history of every article we publish publicly available.

When an article is published we post the peer reviewers' comments and the authors' responses online. We also post the versions of the paper that were used during peer review. These are the versions that the peer review comments apply to.

The versions of the paper that follow are the versions that were submitted during the peer review process. They are not the versions of record or the final published versions. They should not be cited or distributed as the published version of this manuscript.

BMJ Open is an open access journal and the full, final, typeset and author-corrected version of record of the manuscript is available on our site with no access controls, subscription charges or pay-per-view fees (<http://bmjopen.bmj.com>).

If you have any questions on BMJ Open's open peer review process please email [info.bmjopen@bmj.com](mailto:info.bmjopen@bmj.com)

# BMJ Open

## Suicide, other externally caused injuries, and cardiovascular death following a cancer diagnosis: study protocol for a nationwide population-based study in Japan

|                               |                                                                                                                                                                                                                                                                                                                                                                                                                                                                                                                                                                                                                                                                                                                                                                                                                                                                                                                                                                                                                                                                                                                                                                                                                                                                                                                                                                                                                                                                                                                                                                                                                                                                                                                                                                                                                                                                                                |
|-------------------------------|------------------------------------------------------------------------------------------------------------------------------------------------------------------------------------------------------------------------------------------------------------------------------------------------------------------------------------------------------------------------------------------------------------------------------------------------------------------------------------------------------------------------------------------------------------------------------------------------------------------------------------------------------------------------------------------------------------------------------------------------------------------------------------------------------------------------------------------------------------------------------------------------------------------------------------------------------------------------------------------------------------------------------------------------------------------------------------------------------------------------------------------------------------------------------------------------------------------------------------------------------------------------------------------------------------------------------------------------------------------------------------------------------------------------------------------------------------------------------------------------------------------------------------------------------------------------------------------------------------------------------------------------------------------------------------------------------------------------------------------------------------------------------------------------------------------------------------------------------------------------------------------------|
| Journal:                      | <i>BMJ Open</i>                                                                                                                                                                                                                                                                                                                                                                                                                                                                                                                                                                                                                                                                                                                                                                                                                                                                                                                                                                                                                                                                                                                                                                                                                                                                                                                                                                                                                                                                                                                                                                                                                                                                                                                                                                                                                                                                                |
| Manuscript ID                 | bmjopen-2019-030681                                                                                                                                                                                                                                                                                                                                                                                                                                                                                                                                                                                                                                                                                                                                                                                                                                                                                                                                                                                                                                                                                                                                                                                                                                                                                                                                                                                                                                                                                                                                                                                                                                                                                                                                                                                                                                                                            |
| Article Type:                 | Protocol                                                                                                                                                                                                                                                                                                                                                                                                                                                                                                                                                                                                                                                                                                                                                                                                                                                                                                                                                                                                                                                                                                                                                                                                                                                                                                                                                                                                                                                                                                                                                                                                                                                                                                                                                                                                                                                                                       |
| Date Submitted by the Author: | 28-Mar-2019                                                                                                                                                                                                                                                                                                                                                                                                                                                                                                                                                                                                                                                                                                                                                                                                                                                                                                                                                                                                                                                                                                                                                                                                                                                                                                                                                                                                                                                                                                                                                                                                                                                                                                                                                                                                                                                                                    |
| Complete List of Authors:     | <p>Harashima, Saki; National Cancer Center Japan, Division of Health Care Research, Behavioral Science and Survivorship Research Group, Center for Public Health Sciences; University of Tokyo Graduate School of Medicine Faculty of Medicine, Department of Stress Sciences and Psychosomatic Medicine</p> <p>Fujimori, Maiko; National Cancer Center Japan, Division of Health Care Research, Behavioral Science and Survivorship Research Group, Center for Public Health Sciences</p> <p>Akechi, Tatsuo; Nagoya City University Graduate School of Medical Sciences and Medical School, Department of Psychiatry and Cognitive-Behavioral Medicine</p> <p>Matsuda, Tomohiro; National Cancer Center Japan, Center for Cancer Registries, Center for Cancer Control and Information Services</p> <p>Saika, Kumiko; National Cancer Center Japan, Center for Cancer Registries, Center for Cancer Control and Information Services</p> <p>Hasegawa, Takaaki; Nagoya City University Hospital, Division of Psycho-oncology and Palliative Care</p> <p>Inoue, Keisuke; National Cancer Center Japan, Division of Health Care Research, Behavioral Science and Survivorship Research Group, Center for Public Health Sciences; Yokohama City University School of Medicine Graduate School of Medicine, Department of Psychiatry</p> <p>Yoshiuchi, Kazuhiro; University of Tokyo Graduate School of Medicine Faculty of Medicine, Department of Stress Sciences and Psychosomatic Medicine</p> <p>Miyashiro, Isao; Osaka International Cancer Institute, Cancer Control Center</p> <p>Uchitomi, Yosuke; National Cancer Center Hospital, Innovation Center for Supportive, Palliative and Psychosocial Care</p> <p>Matsuoka, Yutaka; National Cancer Center Japan, Division of Health Care Research, Behavioral Science and Survivorship Research Group, Center for Public Health Sciences</p> |
| Keywords:                     | neoplasms, suicide, cardiovascular diseases, registries, standardized mortality ratio                                                                                                                                                                                                                                                                                                                                                                                                                                                                                                                                                                                                                                                                                                                                                                                                                                                                                                                                                                                                                                                                                                                                                                                                                                                                                                                                                                                                                                                                                                                                                                                                                                                                                                                                                                                                          |
|                               |                                                                                                                                                                                                                                                                                                                                                                                                                                                                                                                                                                                                                                                                                                                                                                                                                                                                                                                                                                                                                                                                                                                                                                                                                                                                                                                                                                                                                                                                                                                                                                                                                                                                                                                                                                                                                                                                                                |

1  
2  
3  
4  
5  
6  
7  
8  
9  
10  
11  
12  
13  
14  
15  
16  
17  
18  
19  
20  
21  
22  
23  
24  
25  
26  
27  
28  
29  
30  
31  
32  
33  
34  
35  
36  
37  
38  
39  
40  
41  
42  
43  
44  
45  
46  
47  
48  
49  
50  
51  
52  
53  
54  
55  
56  
57  
58  
59  
60

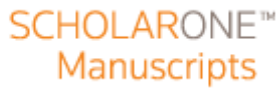

1  
2  
3  
4  
5  
6 **Title**  
7

8  
9  
10 2 Suicide, other externally caused injuries, and cardiovascular death following a cancer  
11  
12 3 diagnosis: study protocol for a nationwide population-based study in Japan  
13  
14

15  
16 4  
17  
18 5 Saki Harashima<sup>1, 2</sup>, Maiko Fujimori<sup>1</sup>, Tatsuo Akechi<sup>3</sup>, Tomohiro Matsuda<sup>4</sup>, Kumiko  
19  
20  
21 6 Saika<sup>4</sup>, Takaaki Hasegawa<sup>5</sup>, Keisuke Inoue<sup>1, 6</sup>, Kazuhiro Yoshiuchi<sup>2</sup>, Isao Miyashiro<sup>7</sup>,  
22  
23  
24 7 Yosuke Uchitomi<sup>8</sup>, Yutaka J. Matsuoka<sup>1</sup>.  
25  
26

27  
28  
29  
30 **Author affiliations**  
31

32  
33 10 1) Division of Health Care Research, Behavioral Science and Survivorship Research  
34  
35  
36 11 Group, Center for Public Health Sciences, National Cancer Center Japan, 5-1-1 Tsukiji,  
37  
38  
39 12 Chuo-ku, Tokyo 104-0045, Japan.  
40  
41

42  
43 13 2) Department of Stress Sciences and Psychosomatic Medicine, University of Tokyo  
44  
45  
46 14 Graduate School of Medicine Faculty of Medicine, Tokyo, Japan.  
47

48  
49 15 3) Department of Psychiatry and Cognitive-Behavioral Medicine, Nagoya City  
50  
51  
52 16 University Graduate School of Medical Sciences and Medical School, Nagoya, Japan.  
53

54  
55 17 4) Center for Cancer Registries, Center for Cancer Control and Information Services,  
56  
57  
58 18 National Cancer Center Japan, Tokyo, Japan.  
59  
60

1  
2  
3  
4  
5  
6 19 5) Division of Psycho-oncology and Palliative Care, Nagoya City University Hospital,  
7  
8  
9 20 Nagoya, Japan.

10  
11  
12 21 6) Department of Psychiatry, Yokohama City University School of Medicine Graduate  
13  
14  
15 22 School of Medicine, Yokohama, Japan.

16  
17  
18 23 7) Cancer Control Center, Osaka International Cancer Institute, Osaka, Japan.

19  
20  
21 24 8) Innovation Center for Supportive, Palliative and Psychosocial Care, National Cancer  
22  
23  
24 25 Center Hospital, Tokyo, Japan.

26  
27  
28  
29  
30 27 Corresponding author: Maiko Fujimori, postal address: Division of Health Care  
31  
32  
33 28 Research, Behavioral Science and Survivorship Research Group, Center for Public  
34  
35  
36 29 Health Sciences, National Cancer Center Japan, 5-1-1 Tsukiji, Chuo-ku, Tokyo 104-  
37  
38  
39 30 0045, Japan. e-mail address: mfujimor@ncc.go.jp, telephone number: +81-3-3547-  
40  
41  
42 31 5201.

43  
44  
45 32 Word Count: 2,127 words

46  
47  
48 33 Keywords: neoplasms, suicide, cardiovascular diseases, registries, standardized mortality  
49  
50  
51 34 ratio

52  
53  
54 35

1  
2  
3  
4  
5  
6 **Abstract**  
7

8  
9 **Introduction:** A growing body of literature has demonstrated that cancer patients have a  
10  
11  
12  
13  
14  
15  
16  
17  
18  
19  
20  
21  
22  
23  
24  
25  
26  
27  
28  
29  
30  
31  
32  
33  
34  
35  
36  
37  
38  
39  
40  
41  
42  
43  
44  
45  
46  
47  
48  
49  
50  
51  
52  
53  
54  
55  
56  
57  
58  
59  
60  
**Introduction:** A growing body of literature has demonstrated that cancer patients have a higher risk of suicide and cardiovascular mortality compared with the general population, especially immediately after diagnosis. Using data from the National Cancer Registry (NCR) in Japan launched in January 2016, we will conduct the first nationwide population-based study in Japan to compare incidence of death from suicide, other externally caused injuries (ECIs), and cardiovascular disease following a cancer diagnosis with that of the general population in Japan. We will also aim to identify the patient subgroups and time periods associated with particularly high risk.

**Methods and analysis:** Our study cohort will consist of all cancer cases diagnosed in Japan from 1 January 2016 onward and registered in the NCR. We are planning a series of analyses according to data availability from the NCR; the duration of patient inclusion and follow-up will be different for each analysis. We will calculate standardized mortality ratios (SMRs) and excess absolute risks (EARs) for suicide, other ECIs, and cardiovascular death compared with the general population in Japan, after adjustment for sex, age, and prefecture. SMRs and EARs will be calculated separately in relation to a number of factors: sex; age at diagnosis; time since cancer diagnosis; prefecture of residence at diagnosis; primary tumor site; behavior code of tumor; extension of tumor;

1  
2  
3  
4  
5  
6 54 whether definitive surgery of the primary site was performed; and month of death. We  
7  
8  
9 55 will conduct the first analysis using cancer incidence and death information from year  
10  
11  
12 56 2016 cases, which will become available in 2019.

13  
14  
15 57 **Ethics and dissemination:** The study protocol was approved by the institutional review  
16  
17  
18 58 board and ethics committee of the National Cancer Center Japan and Nagoya City  
19  
20  
21 59 University Graduate School of Medical Sciences. The findings will be disseminated  
22  
23  
24 60 through peer-reviewed publications and conference presentations.

25  
26  
27 61 **Registration number:** UMIN000035118  
28  
29  
30  
31 62

### 32 33 63 **Strengths and limitations of this study**

- 34  
35  
36 64 • This will be the first nationwide population-based study in Japan to investigate the  
37  
38  
39 65 impact of a cancer diagnosis on subsequent death by suicide, other externally caused  
40  
41  
42 66 injuries, and cardiovascular events.
- 43  
44  
45 67 • Our study will cover virtually all cancer incidence and subsequent fatal outcomes in  
46  
47  
48 68 Japan.
- 49  
50  
51 69 • Our study will not be able to control for potential confounding factors for cancer,  
52  
53  
54 70 suicide, and cardiovascular events, such as smoking history and alcohol use,  
55  
56  
57 71 sociodemographic status, and pre-existing medical and psychiatric conditions.  
58  
59  
60

- 1  
2  
3  
4  
5  
6  
7 72 • Incidence and survival data in the NCR may be incomplete and/or unstable for the  
8  
9 73 first few years after its launch.  
10  
11  
12  
13 74

14  
15 75 **Introduction**

16  
17  
18 76 In Japan, it is estimated that approximately 1 million people have been newly diagnosed  
19  
20  
21 77 with cancer annually in recent years, and about 1 in 2 Japanese will receive a cancer  
22  
23  
24 78 diagnosis during their lifetime.<sup>1</sup>

25  
26  
27 79 Receiving a cancer diagnosis and undergoing diagnostic workup leading to a definite  
28  
29  
30 80 cancer diagnosis are highly stressful experiences for cancer patients, and a high  
31  
32  
33 81 prevalence of psychiatric symptoms and disorders has been observed around the time of  
34  
35  
36 82 cancer diagnosis.<sup>2,3</sup> A number of population-based studies have consistently  
37  
38  
39 83 demonstrated that patients with cancer are at increased risk for suicide,<sup>4-15</sup> especially in  
40  
41  
42 84 the weeks after their cancer diagnosis.<sup>16-19</sup> A high incidence of other externally caused  
43  
44  
45 85 injuries (ECIs), including accidental death and death due to events of undetermined intent,  
46  
47  
48 86 has also been reported among cancer patients.<sup>20-22</sup> Some suicide deaths may be  
49  
50  
51 87 misclassified as other ECIs,<sup>23,24</sup> and physical, psychological, and social impairment due  
52  
53  
54 88 to cancer itself or adverse effects of cancer treatment could increase the risk of accidental  
55  
56  
57 89 death.<sup>25</sup>  
58  
59  
60



1  
2  
3  
4  
5  
6 90 Furthermore, a few population-based studies have demonstrated that the period  
7  
8  
9 91 immediately after a cancer diagnosis is related to elevated mortality from cardiovascular  
10  
11  
12 92 causes among patients with prostate cancer<sup>26,27</sup> and those with other cancer types as  
13  
14  
15 93 well.<sup>17</sup> Acute psychological stressors, such as earthquakes, war, and the death of a loved  
16  
17  
18 94 one, are known to trigger cardiovascular events.<sup>28-31</sup> Acute emotional distress induced by  
19  
20  
21 95 a cancer diagnosis may also affect cardiovascular functioning and cause critical outcomes  
22  
23  
24 96 beyond the influence of cancer itself or cancer treatment. Possible mechanisms linking  
25  
26  
27 97 acute psychological stressors to cardiovascular events include pathophysiological  
28  
29  
30 98 pathways that have the potential to cause rupture of vulnerable plaque, thrombosis  
31  
32  
33 99 formation, or fatal arrhythmias (e.g., increased sympathetic tone, blood pressure, shear  
34  
35  
36 100 stress, and blood viscosity; endothelial dysfunction; and hypercoagulability), and health-  
37  
38  
39 101 impairing behaviors related to emotional distress.<sup>28,29</sup>

40  
41  
42 102 Suicide risk among persons with cancer has been suggested to differ between different  
43  
44  
45 103 ethnic and cultural groups.<sup>32</sup> Two previous studies have reported risk of suicide among  
46  
47  
48 104 Japanese patients with cancer compared with the general population.<sup>22,33</sup> The first, a  
49  
50  
51 105 single-institution study demonstrated that suicide risk among patients newly diagnosed  
52  
53  
54 106 with cancer was significantly elevated within the first year after diagnosis.<sup>33</sup> The second,  
55  
56  
57 107 a population-based prospective study investigating Japanese residents and including over  
58  
59  
60

1  
2  
3  
4  
5  
6 108 10,000 cancer patients, showed that risk of death by suicide and other ECIs was about 24  
7  
8  
9 109 and 19 times higher, respectively, among those with cancer within the first year after  
10  
11  
12 110 cancer diagnosis than among those without cancer.<sup>22</sup> There has been no nationwide study  
13  
14  
15 111 examining the risk of suicide among cancer patients in Japan, and cardiovascular  
16  
17  
18 112 mortality risk following a cancer diagnosis has not been investigated in countries other  
19  
20  
21 113 than Sweden and the United States. As Japan is aging faster than any other country in the  
22  
23  
24 114 world and the number of patients with newly diagnosed cancer is expected to keep  
25  
26  
27 115 increasing,<sup>34</sup> the impact of a cancer diagnosis on subsequent stress-related outcomes is a  
28  
29  
30 116 serious public health issue. It is necessary to identify vulnerable patients and the window  
31  
32  
33 117 of maximum risk in order to implement appropriate supportive and preventive  
34  
35  
36 118 intervention.

37  
38  
39 119 The Act on Promotion of Cancer Registries was enacted in Japan in 2013 and the  
40  
41  
42 120 National Cancer Registry (NCR) in Japan was launched on 1 January 2016.<sup>35,36</sup>  
43  
44  
45 121 According to the Act, hospitals in Japan have a legal duty to report all targeted cancer  
46  
47  
48 122 cases to the NCR. The NCR has enabled hospitals to calculate accurate cancer incidences  
49  
50  
51 123 and survival rates, and it is expected that the NCR database will contribute to planning  
52  
53  
54 124 and assessment of evidence-based cancer control policies and promote research in such  
55  
56  
57 125 areas as evaluation of cancer care quality and follow-up surveys in nationwide cohort  
58  
59  
60

1  
2  
3  
4  
5  
6 126 studies. The first NCR data will become available for research purposes in 2019.  
7  
8

9 127 Using data from the NCR, we will conduct the first nationwide population-based study  
10  
11  
12 128 in Japan to characterize the incidence of death by suicide, ECIs, and cardiovascular  
13  
14  
15 129 disease among patients with a cancer diagnosis compared with the general population in  
16  
17  
18 130 Japan. We will also aim to identify higher-risk patients and time periods that may require  
19  
20  
21 131 more attention. We hypothesize that the risk of suicide, other ECIs, and cardiovascular  
22  
23  
24 132 death is significantly higher within the first year after a cancer diagnosis and that the  
25  
26  
27 133 period soon after a cancer diagnosis is associated with the greatest risk.  
28  
29

30  
31 134

## 32 33 135 **Methods**

### 34 35 136 **Data sources**

36  
37  
38  
39 137 Cancer patients will be identified from the NCR database in Japan. The NCR covers the  
40  
41  
42 138 total population in Japan, and hospitals are required to report all targeted cancer cases  
43  
44  
45 139 newly diagnosed in their institutions from 1 January 2016 onward, irrespective of patient  
46  
47  
48 140 nationality. Data from cancer care hospitals are submitted annually and matched inter-  
49  
50  
51 141 prefecturally, and mortality data submitted by municipalities are matched with the  
52  
53  
54 142 incidence data in the NCR database. The data collection deadline for each year's cases is  
55  
56  
57 143 the end of the following year, and the data will become available for research purposes  
58  
59  
60

1  
2  
3  
4  
5  
6 144 the year after that. The unit of registration is tumor, duplications of the same cancer case  
7  
8  
9 145 are corrected, and each cancer is registered separately for cases in which a patient is  
10  
11  
12 146 judged to have multiple primary cancers based on pathology.  
13  
14

15 147 The targeted neoplasms for the NCR include intraepithelial and malignant tumors  
16  
17  
18 148 corresponding to a behavioral code of 2 or 3 in the International Classification of Diseases  
19  
20  
21 149 for Oncology, Third Edition (ICD-O-3); benign and uncertain whether benign or  
22  
23  
24 150 malignant central nervous system (CNS) neoplasms and gastrointestinal stromal tumors;  
25  
26  
27 151 and some types of ovarian borderline malignant tumors. The standard items submitted to  
28  
29  
30 152 the NCR by cancer care hospitals are presented in Table 1. The date of cancer diagnosis  
31  
32  
33 153 is defined as the date of the most definitive diagnostic test before initiation of treatment.  
34  
35  
36 154 Information such as race, educational status, marital status, income, insurance status, and  
37  
38  
39 155 comorbidity is not registered in the NCR database.  
40  
41

42 156 Details of the NCR system have been described previously.<sup>35,36</sup>  
43  
44

45 157  
46  
47

#### 48 158 **Study population and inclusion criteria**

49

50  
51 159 Our study cohort will consist of all cancer cases diagnosed in Japan and registered in the  
52  
53  
54 160 NCR from 1 January 2016 onward. We will exclude cancer cases that are diagnosed  
55  
56  
57 161 incidentally at autopsy, reported only on a death certificate, or missing a diagnosis date.  
58  
59  
60

1  
2  
3  
4  
5  
6 162 For individuals with multiple cancers, the start of the at-risk period will be defined as the  
7  
8  
9 163 date of the most recent cancer diagnosis. It is estimated that about 1 million cancer  
10  
11  
12 164 patients have been diagnosed annually in recent years in Japan.<sup>1</sup> We are planning a series  
13  
14  
15 165 of analyses according to NCR data availability, and the duration of patient inclusion and  
16  
17  
18 166 follow-up will be different for each analysis. We will conduct the first analysis in 2019,  
19  
20  
21 167 using cancer incidence and death information from year 2016 cases.  
22  
23

24 168

### 27 169 **Study variables**

29  
30 170 We will identify cancer patients who died by suicide, ECIs, and cardiovascular causes  
31  
32  
33 171 based on cause of death registered in the NCR database. Outcomes will be classified  
34  
35  
36 172 according to the International Classification of Diseases, 10th Edition (ICD-10) as  
37  
38  
39 173 follows: suicide (X60-X84 and Y87.0), other ECIs (V01-X59 and Y10-Y34), and  
40  
41  
42 174 cardiovascular diseases (I00-I99). Cardiovascular death will be further subcategorized as  
43  
44  
45 175 myocardial infarction (I21-I24), other disease of the heart (I10-I13, I71, and I72),  
46  
47  
48 176 embolism or thrombosis (I26, I74, I80.1, I81, I82, and I85.0), stroke (I60-I64),  
49  
50  
51 177 hemorrhagic stroke (I60-I62), ischemic stroke (I63), and others.  
52

53  
54 178 Other information we will obtain from the NCR includes sex, age at diagnosis,  
55  
56  
57 179 prefecture of residence at diagnosis, presence/absence of multiple primary tumors,  
58  
59  
60

1  
2  
3  
4  
5  
6 180 primary site of tumor according to ICD-10 codes, basis of diagnosis, date of diagnosis,  
7  
8  
9 181 extension of tumor, presence/absence of each treatment, presence/absence of definitive  
10  
11  
12 182 surgery of the primary site, hospital region, survival status, and survival time..  
13  
14

15  
16 183

### 17 18 184 **Statistical analysis**

19  
20  
21 185 Standardized mortality ratios (SMRs) will be calculated as the observed numbers of  
22  
23  
24 186 targeted events (i.e., suicide, other ECIs, or cardiovascular death) among cancer patients  
25  
26  
27 187 divided by the expected numbers of events in the general population. Excess absolute  
28  
29  
30 188 risks (EARs) will be calculated by subtracting the expected numbers of events from the  
31  
32  
33 189 observed numbers of events; the difference will be then divided by person-years of cancer  
34  
35  
36 190 patients, and the number of events in excess will be expressed per 10,000 person-years.  
37  
38  
39 191 The expected numbers of events will be obtained by multiplying the number of person-  
40  
41  
42 192 years at risk, stratified by sex, age group (0-4, 5-9, ..., 80-84,  $\geq 85$  years), prefecture, and  
43  
44  
45 193 calendar year, by mortality rates from targeted events in each year in the general  
46  
47  
48 194 population in Japan in each corresponding stratum. We will calculate mortality rates by  
49  
50  
51 195 sex, age, and prefecture in each year in the general population by dividing the numbers  
52  
53  
54 196 of death from each event occurring in Japan (based on datasets from Vital Statics Japan,  
55  
56  
57 197 provided by the Ministry of Health, Labour and Welfare) by the estimated total population  
58  
59  
60

1  
2  
3  
4  
5  
6 198 in Japan based on Population Estimates.<sup>37</sup> We will calculate 95% confidence intervals  
7  
8  
9 199 (CIs) of SMRs and EARs by assuming that the observed numbers of events follow a  
10  
11  
12 200 Poisson distribution. All analyses will be performed using SPSS Statistics for Windows,  
13  
14  
15 201 Version 25.0 (Armonk, NY: IBM Corp).

16  
17  
18 202 SMRs and EARs will be calculated separately in relation to a number of factors: sex,  
19  
20  
21 203 age at diagnosis, time since cancer diagnosis, prefecture of residence at diagnosis, primary  
22  
23  
24 204 tumor site, behavioral code of tumor, extension of tumor, whether definitive surgery of the  
25  
26  
27 205 primary site was performed, and month of death. Age at diagnosis will be stratified into  
28  
29  
30 206 the following groups: 0-39, 40-49, 50-59, 60-69, 70-79, and  $\geq 80$  years. Primary tumor  
31  
32  
33 207 site will be based on the classifications used in the Monitoring of Cancer Incidence in  
34  
35  
36 208 Japan (MCIJ) project (Table 2).<sup>38</sup> The extension of tumor will be classified into localized  
37  
38  
39 209 (confined to the original organ), regional (spread to regional lymph nodes and/or adjacent  
40  
41  
42 210 tissue), metastatic (metastasized to distant organ), and unknown. Stroke will be excluded  
43  
44  
45 211 from cardiovascular mortality in the analysis of CNS tumors, and CNS tumors will be  
46  
47  
48 212 excluded from “any cancer” in the analysis of death from cardiovascular causes. Cases of  
49  
50  
51 213 hematologic disease will be excluded in the analysis of presence/absence of definitive  
52  
53  
54 214 surgery. We will also explore the suicide methods used by cancer patients and the factors  
55  
56  
57 215 affecting their choice of method.  
58  
59  
60

1  
2  
3  
4  
5  
6 216 We will also divide cancer patients who die during the observation period into 3  
7  
8  
9 217 groups according to the main cause of death: (1) cancer, (2) suicide, other ECIs, and  
10  
11  
12 218 cardiovascular diseases, and (3) others. Characteristics of patients and tumors will be  
13  
14  
15 219 compared among these groups.  
16  
17

18 220

## 21 221 **Discussion**

22  
23  
24 222 This will be the first nationwide study in Japan to investigate the impact of a cancer  
25  
26  
27 223 diagnosis on subsequent death by suicide, other ECIs, and cardiovascular events. The  
28  
29  
30 224 main strength of this study is that it will cover virtually all cancer incidence and  
31  
32  
33 225 subsequent fatal outcomes in Japan using information registered in the NCR. SMRs and  
34  
35  
36 226 EARs of stress-related outcomes after a cancer diagnosis will help to identify higher-risk  
37  
38  
39 227 patients and time periods, and will provide useful evidence for considering the priority of  
40  
41  
42 228 preventive strategies.  
43  
44

45 229 Several limitations inherent in this study should be acknowledged. First, our study will  
46  
47  
48 230 not be able to control for potential confounding factors for cancer, suicide, and  
49  
50  
51 231 cardiovascular events, such as smoking history and alcohol use, sociodemographic status,  
52  
53  
54 232 and pre-existing medical and psychiatric conditions. These data are not collected in the  
55  
56  
57 233 NCR and we cannot link anonymous cancer registry information to other medical and  
58  
59  
60



1  
2  
3  
4  
5  
6 234 socioeconomic databases. Second, our study will explore mortality outcomes alone and  
7  
8  
9 235 we cannot capture nonfatal outcomes, such as suicidal ideation, attempted suicide, and  
10  
11  
12 236 nonlethal cardiovascular events. Our findings will represent only a small portion of the  
13  
14  
15 237 psychological burden associated with a cancer diagnosis. Finally, although we will use  
16  
17  
18 238 data from the NCR, which covers the total population in Japan, it is anticipated that  
19  
20  
21 239 incidence and survival data in the NCR may be incomplete and/or unstable for the first  
22  
23  
24 240 few years after its 2016 launch.  
25  
26  
27  
28  
29

## 30 242 **Article Summary**

### 31 243 **Patient and public involvement**

32  
33  
34 244 Patients and/or public were not involved.  
35  
36  
37  
38  
39  
40  
41

### 42 246 **Ethics and dissemination**

43  
44  
45 247 The study protocol was approved by the institutional review board and ethics committee  
46  
47  
48 248 of the National Cancer Center Japan and Nagoya City University Graduate School of  
49  
50  
51 249 Medical Sciences. The Act on Promotion of Cancer Registries does not require informed  
52  
53  
54 250 consent for the provision of anonymous information, and the requirement for opt-out will  
55  
56  
57 251 be waived because no personal identifiable information will be accessed. The findings  
58  
59  
60

1  
2  
3  
4  
5  
6 252 will be disseminated through peer-reviewed publications and conference presentations.  
7  
8

9 253  
10

## 11 254 **Acknowledgement**

12  
13  
14  
15 255 This study is reviewed and supported by the Japan Supportive, Palliative and  
16  
17  
18 256 Psychosocial Oncology Group (J-SUPPORT) in terms of the adequacy of the research  
19  
20  
21 257 involved, and approved as J-SUPPORT 1902.  
22

23  
24 258  
25

## 26 259 **Footnotes**

## 27 260 **Author Contributions**

28  
29  
30  
31 261 SH and MF wrote the first draft of the manuscript and subsequently incorporated the  
32  
33  
34 262 suggested revisions. All authors contributed to the study conception and design. TM and  
35  
36  
37 263 KS advised on statistical analysis and management of the database. TA and YU  
38  
39  
40 264 supervised the project. All authors contributed to revision of the protocol and have  
41  
42  
43 265 approved the final version of the manuscript.  
44  
45  
46

47  
48 266  
49

## 50 267 **Funding**

51  
52  
53  
54 268 This work is supported by the Innovative Research Program on Suicide Countermeasures  
55  
56  
57 269 (IRPSC) (1-2), Japan Support Center for Suicide Countermeasures (JSSC), National  
58  
59  
60

1  
2  
3  
4  
5  
6  
7  
8  
9  
10  
11  
12  
13  
14  
15  
16  
17  
18  
19  
20  
21  
22  
23  
24  
25  
26  
27  
28  
29  
30  
31  
32  
33  
34  
35  
36  
37  
38  
39  
40  
41  
42  
43  
44  
45  
46  
47  
48  
49  
50  
51  
52  
53  
54  
55  
56  
57  
58  
59  
60

270 Center of Neurology and Psychiatry (NCNP). The funders had no role in study design,  
271 data collection and analysis, decision to publish, or preparation of the manuscript.

272

273 **Competing interests**

274 None declared.

For peer review only

1  
2  
3  
4  
5  
6 275  
7  
8

9 276 **REFERENCES**

10  
11  
12 277 1. Cancer Registry and Statistics. Cancer Information Service, National Cancer Center,  
13  
14  
15 278 Japan. Projected Cancer Statistics, 2018.

16  
17  
18 279 [https://ganjoho.jp/en/public/statistics/short\\_pred.html](https://ganjoho.jp/en/public/statistics/short_pred.html) (accessed 18 Jan 2019).

19  
20  
21 280 2. Mitchell AJ, Chan M, Bhatti H, et al. Prevalence of depression, anxiety, and adjustment  
22  
23  
24 281 disorder in oncological, haematological, and palliative-care settings: a meta-analysis of  
25  
26  
27 282 94 interview-based studies. *Lancet Oncol* 2011; 12: 160-174.

28  
29  
30 283 3. Lu D, Andersson TM, Fall K, et al. Clinical diagnosis of mental disorders immediately  
31  
32  
33 284 before and after cancer diagnosis: a nationwide matched cohort study in Sweden. *JAMA*  
34  
35  
36 285 *Oncol* 2016; 2: 1188-1196.

37  
38  
39 286 4. Harris EC, Barraclough BM. Suicide as an outcome for medical disorders. *Medicine*  
40  
41  
42 287 (Baltimore) 1994; 73: 281-296.

43  
44  
45 288 5. Robson A, Scrutton F, Wilkinson L, et al. The risk of suicide in cancer patients: a  
46  
47  
48 289 review of the literature. *Psychooncology* 2010; 19: 1250-1258.

49  
50  
51 290 6. Spoletini I, Gianni W, Caltagirone C, et al. Suicide and cancer: where do we go from  
52  
53  
54 291 here? *Crit Rev Oncol Hematol* 2011; 78: 206-219.

55  
56  
57 292 7. Anguiano L, Mayer DK, Piven ML, et al. A literature review of suicide in cancer  
58  
59  
60

- 1  
2  
3  
4  
5  
6 293 patients. *Cancer Nurs* 2012; 35: E14-E26.
- 7  
8  
9 294 8. Ahn E, Shin DW, Cho SI, et al. Suicide rates and risk factors among Korean cancer  
10  
11  
12 295 patients, 1993-2005. *Cancer Epidemiol Biomarkers Prev* 2010; 19: 2097-2105.
- 13  
14  
15 296 9. Lu D, Fall K, Sparén P, et al. Suicide and suicide attempt after a cancer diagnosis  
16  
17  
18 297 among young individuals. *Ann Oncol* 2013; 24: 3112-3117.
- 19  
20  
21 298 10. Oberaigner W, Sperner-Unterweger B, Fiegl M, et al. Increased suicide risk in cancer  
22  
23  
24 299 patients in Tyrol/Austria. *Gen Hosp Psychiatry* 2014; 36: 483-487.
- 25  
26  
27 300 11. Vyssoki B, Gleiss A, Rockett IR, et al. Suicide among 915,303 Austrian cancer  
28  
29  
30 301 patients: Who is at risk? *Journal of Affective Disorders* 2015; 175: 287-291.
- 31  
32  
33 302 12. Lin PH, Liao SC, Chen IM, et al. Impact of universal health coverage on suicide risk  
34  
35  
36 303 in newly diagnosed cancer patients: Population-based cohort study from 1985 to 2007  
37  
38  
39 304 in Taiwan. *Psychooncology* 2017; 26: 1852-1859.
- 40  
41  
42 305 13. Kaceniene A, Krilaviciute A, Kazlauskienė J, et al. Increasing suicide risk among  
43  
44  
45 306 cancer patients in Lithuania from 1993 to 2012: a cancer registry-based study. *Eur J*  
46  
47  
48 307 *Cancer Prev* 2017; 26: S197-S203.
- 49  
50  
51 308 14. Saad AM, Gad M, Alkhayat M, et al. Suicidal death within a year of cancer diagnosis;  
52  
53  
54 309 a population-based study. *Cancer* 2019; 125: 972-979.
- 55  
56  
57 310 15. Henson KE, Brock R, Charnock J, et al. Risk of suicide after cancer diagnosis in  
58  
59  
60

- 1  
2  
3  
4  
5  
6 311 England. JAMA Psychiatry 2018 (in press).  
7  
8  
9 312 16. Hem E, Loge JH, Haldorsen T, et al. Suicide risk in cancer patients from 1960 to  
10  
11  
12 313 1999. J Clin Oncol 2004; 22: 4209-4216.  
13  
14  
15 314 17. Fang F, Fall K, Mittleman MA, et al. Suicide and cardiovascular death after a cancer  
16  
17  
18 315 diagnosis. N Engl J Med 2012; 366: 1310-1318.  
19  
20  
21 316 18. Johnson TV, Garlow SJ, Brawley OW, et al. Peak window of suicides occurs within  
22  
23  
24 317 the first month of diagnosis: implications for clinical oncology. Psychooncology 2012;  
25  
26  
27 318 21: 351-356.  
28  
29  
30 319 19. Wang SM, Chang JC, Weng SC, et al. Risk of suicide within 1 year of cancer  
31  
32  
33 320 diagnosis. Int J Cancer 2018; 142: 1986-1993.  
34  
35  
36 321 20. Kendal WS, Kendal WM. Comparative risk factors for accidental and suicidal death  
37  
38  
39 322 in cancer patients. Crisis 2012; 33: 325-334.  
40  
41  
42 323 21. Dalela D, Krishna N, Okwara J, et al. Suicide and accidental deaths among patients  
43  
44  
45 324 with non-metastatic prostate cancer. BJU Int 2016; 118: 286-297.  
46  
47  
48 325 22. Yamauchi T, Inagaki M, Yonemoto N, et al. Death by suicide and other externally  
49  
50  
51 326 caused injuries following a cancer diagnosis: the Japan Public Health Center-based  
52  
53  
54 327 Prospective Study. Psychooncology 2014; 23: 1034-1041.  
55  
56  
57 328 23. Pritchard C, Hean S. Suicide and undetermined deaths among youths and young adults  
58  
59  
60

- 1  
2  
3  
4  
5  
6 329 in Latin America: comparison with the 10 major developed countries-a source of  
7  
8  
9 330 hidden suicides? Crisis 2008; 29: 145-153.
- 11  
12 331 24. Rockett IR, Hobbs G, De Leo D, et al. Suicide and unintentional poisoning mortality  
13  
14  
15 332 trends in the United States, 1987-2006: two unrelated phenomena? BMC Public Health  
16  
17  
18 333 2010; 10: 705.
- 20  
21 334 25. Bergen H, Hawton K, Kapur N, et al. Shared characteristics of suicides and other  
22  
23  
24 335 unnatural deaths following non-fatal self-harm? A multicentre study of risk factors.  
25  
26  
27 336 Psychol Med 2012; 42: 727-741.
- 29  
30 337 26. Fall K, Fang F, Mucci LA, et al. Immediate risk for cardiovascular events and suicide  
31  
32  
33 338 following a prostate cancer diagnosis: prospective cohort study. PLoS Med 2009; 6:  
34  
35  
36 339 e1000197.
- 38  
39 340 27. Fang F, Keating NL, Mucci LA, et al. Immediate risk of suicide and cardiovascular  
40  
41  
42 341 death after a prostate cancer diagnosis: cohort study in the United States. J Natl Cancer  
43  
44  
45 342 Inst 2010; 102: 307-314.
- 47  
48 343 28. Dimsdale JE. Psychological stress and cardiovascular disease. J Am Coll Cardiol  
49  
50  
51 344 2008; 51: 1237-1246.
- 53  
54 345 29. Schwartz BG, French WJ, Mayeda GS, et al. Emotional stressors trigger  
55  
56  
57 346 cardiovascular events. Int J Clin Pract. 2012; 66: 631-639.
- 58  
59  
60

- 1  
2  
3  
4  
5  
6 347 30. Mostofsky E, Maclure M, Sherwood JB, et al. Risk of acute myocardial infarction  
7  
8  
9 348 after the death of a significant person in one's life: the determinants of myocardial  
10  
11  
12 349 infarction onset study. *Circulation* 2012; 125: 491-496.  
13  
14  
15 350 31. Berntson J, Patel JS, Stewart JC. Number of recent stressful life events and incident  
16  
17  
18 351 cardiovascular disease: Moderation by lifetime depressive disorder. *J Psychosom Res*  
19  
20  
21 352 2017; 99: 149-154.  
22  
23  
24 353 32. Nakash O, Barchana M, Liphshitz I, et al. The effect of cancer on suicide in ethnic  
25  
26  
27 354 groups with a differential suicide risk. *Eur J Public Health* 2013; 23: 114-115.  
28  
29  
30 355 33. Tanaka H, Tsukuma H, Masaoka T, et al. Suicide risk among cancer patients:  
31  
32  
33 356 experience at one medical center in Japan, 1978-1994. *Jpn J Cancer Res* 1999; 90:  
34  
35  
36 357 812-817.  
37  
38  
39 358 34. Utada M, Ohno Y, Shimizu S, et al. Cancer incidence and mortality in Osaka, Japan:  
40  
41  
42 359 future trends estimation with an age-period-cohort model. *Asian Pac J Cancer Prev*  
43  
44  
45 360 2012; 13: 3893-3898.  
46  
47  
48 361 35. Matsuda T, Sobue T. Recent trends in population-based cancer registries in Japan: the  
49  
50  
51 362 Act on Promotion of Cancer Registries and drastic changes in the historical registry.  
52  
53  
54 363 *Int J Clin Oncol* 2015; 20: 11-20.  
55  
56  
57 364 36. Tanaka H, Matsuda T. Arrival of a new era in Japan with the establishment of the  
58  
59  
60



- 1  
2  
3  
4  
5  
6 365 Cancer Registration Promotion Act. *Eur J Cancer Prev* 2015; 24: 542-543.
- 7  
8  
9 366 37. Statistics Bureau, Ministry of the Internal Affairs and Communications, Statistics  
10  
11  
12 367 Japan. Population Estimates, Annual Report. [https://www.e-stat.go.jp/en/stat-](https://www.e-stat.go.jp/en/stat-search/files?page=1&layout=datalist&toukei=00200524&tstat=000000090001&cycle=7&month=0&tclass1=000001011679&cycle_facet=tclass1%3Acycle&second2=1)  
13  
14  
15 368 [search/files?page=1&layout=datalist&toukei=00200524&tstat=000000090001&cycl](https://www.e-stat.go.jp/en/stat-search/files?page=1&layout=datalist&toukei=00200524&tstat=000000090001&cycle=7&month=0&tclass1=000001011679&cycle_facet=tclass1%3Acycle&second2=1)  
16  
17  
18 369 [e=7&month=0&tclass1=000001011679&cycle\\_facet=tclass1%3Acycle&second2=1](https://www.e-stat.go.jp/en/stat-search/files?page=1&layout=datalist&toukei=00200524&tstat=000000090001&cycle=7&month=0&tclass1=000001011679&cycle_facet=tclass1%3Acycle&second2=1)  
19  
20  
21 370 (accessed 18 Jan 2019)
- 22  
23  
24 371 38. Hori M, Matsuda T, Shibata A, et al. Cancer incidence and incidence rates in Japan  
25  
26  
27 372 in 2009: a study of 32 population-based cancer registries for the Monitoring of Cancer  
28  
29  
30 373 Incidence in Japan (MCIJ) project. *Jpn J Clin Oncol* 2015; 45: 884-891.
- 31  
32  
33 374

375 Table 1. Items submitted to the National Cancer Registry in Japan by cancer care hospitals.

|                             |                                         |
|-----------------------------|-----------------------------------------|
| 1. Name of hospital         | 14. Date of diagnosis                   |
| 2. Patient's ID             | 15. Circumstance of cancer detection    |
| 3. Name (Hiragana)          | 16. Extension of disease (clinical)     |
| 4. Name (Kanji)             | 17. Extension of disease (pathological) |
| 5. Sex                      | 18. Surgery of primary site             |
| 6. Birth date               | 19. Laparo/thoracoscopic surgery        |
| 7. Address of patients      | 20. Endoscopic surgery                  |
| 8. Laterality               | 21. Result of surgery                   |
| 9. Diagnosis (primary site) | 22. Radiation therapy                   |
| 10. Diagnosis (morphology)  | 23. Chemotherapy                        |
| 11. Diagnosis facility      | 24. Endocrinotherapy                    |
| 12. Treatment facility      | 25. Other treatment                     |
| 13. Basis of diagnosis      | 26. Date of death                       |

376

377 Table 2. Primary tumor site according to International Classification of Diseases, 10th  
 378 Edition code used in the Monitoring of Cancer Incidence in Japan (MCIJ) project.<sup>38</sup>

|                                                           |                                                               |
|-----------------------------------------------------------|---------------------------------------------------------------|
| Any cancer (C00-C96, D00-D09)                             | Breast (C50, D05)                                             |
| Oral cavity and pharynx (C00-C14)                         | Uterus (C53-C55, D06)                                         |
| Esophagus (C15, D001)                                     | Cervix uteri (C53, D06)                                       |
| Stomach (C16)                                             | Corpus uteri (C54)                                            |
| Colon and rectum (C18-C20, D010-D012)                     | Ovary (C56)                                                   |
| Colon (C18 and D010)                                      | Prostate (C61)                                                |
| Rectum (C19-C20, D011-D012)                               | Bladder (C67, D090)                                           |
| Liver and intrahepatic bile ducts (C22)                   | Kidney and urinary organs (except bladder) (C64-<br>C66, C68) |
| Gallbladder and other parts of biliary tract<br>(C23-C24) | Brain and other parts of central nervous system<br>(C70-C72)  |
| Pancreas (C25)                                            | Thyroid (C73)                                                 |
| Larynx (C32)                                              | Malignant lymphoma (C81-C85, C96)                             |
| Lung and bronchus (C33-C34, D021-D022)                    | Multiple myeloma (C88, C90)                                   |
| Skin (C43-C44, D030-D049)                                 | Leukemia (C91-C95)                                            |

379

380

381

## STROBE Statement—checklist of items that should be included in reports of observational studies

|                              | Item No | Recommendation                                                                                                                                                                                                                                                                                                                                                                                                                                                         | Page No |
|------------------------------|---------|------------------------------------------------------------------------------------------------------------------------------------------------------------------------------------------------------------------------------------------------------------------------------------------------------------------------------------------------------------------------------------------------------------------------------------------------------------------------|---------|
| <b>Title and abstract</b>    | 1       | (a) Indicate the study's design with a commonly used term in the title or the abstract                                                                                                                                                                                                                                                                                                                                                                                 | 1, 3    |
|                              |         | (b) Provide in the abstract an informative and balanced summary of what was done and what was found                                                                                                                                                                                                                                                                                                                                                                    | 3       |
| <b>Introduction</b>          |         |                                                                                                                                                                                                                                                                                                                                                                                                                                                                        |         |
| Background/rationale         | 2       | Explain the scientific background and rationale for the investigation being reported                                                                                                                                                                                                                                                                                                                                                                                   | 4-7     |
| Objectives                   | 3       | State specific objectives, including any prespecified hypotheses                                                                                                                                                                                                                                                                                                                                                                                                       | 7       |
| <b>Methods</b>               |         |                                                                                                                                                                                                                                                                                                                                                                                                                                                                        |         |
| Study design                 | 4       | Present key elements of study design early in the paper                                                                                                                                                                                                                                                                                                                                                                                                                | 7       |
| Setting                      | 5       | Describe the setting, locations, and relevant dates, including periods of recruitment, exposure, follow-up, and data collection                                                                                                                                                                                                                                                                                                                                        | 7-10    |
| Participants                 | 6       | (a) <i>Cohort study</i> —Give the eligibility criteria, and the sources and methods of selection of participants. Describe methods of follow-up<br><i>Case-control study</i> —Give the eligibility criteria, and the sources and methods of case ascertainment and control selection. Give the rationale for the choice of cases and controls<br><i>Cross-sectional study</i> —Give the eligibility criteria, and the sources and methods of selection of participants | 9       |
|                              |         | (b) <i>Cohort study</i> —For matched studies, give matching criteria and number of exposed and unexposed<br><i>Case-control study</i> —For matched studies, give matching criteria and the number of controls per case                                                                                                                                                                                                                                                 |         |
| Variables                    | 7       | Clearly define all outcomes, exposures, predictors, potential confounders, and effect modifiers. Give diagnostic criteria, if applicable                                                                                                                                                                                                                                                                                                                               | 9-10    |
| Data sources/<br>measurement | 8*      | For each variable of interest, give sources of data and details of methods of assessment (measurement). Describe comparability of assessment methods if there is more than one group                                                                                                                                                                                                                                                                                   | 9-10    |
| Bias                         | 9       | Describe any efforts to address potential sources of bias                                                                                                                                                                                                                                                                                                                                                                                                              |         |
| Study size                   | 10      | Explain how the study size was arrived at                                                                                                                                                                                                                                                                                                                                                                                                                              | 9       |
| Quantitative variables       | 11      | Explain how quantitative variables were handled in the analyses. If applicable, describe which groupings were chosen and why                                                                                                                                                                                                                                                                                                                                           | 10      |
| Statistical methods          | 12      | (a) Describe all statistical methods, including those used to control for confounding                                                                                                                                                                                                                                                                                                                                                                                  | 10-12   |
|                              |         | (b) Describe any methods used to examine subgroups and interactions                                                                                                                                                                                                                                                                                                                                                                                                    | 11-12   |
|                              |         | (c) Explain how missing data were addressed                                                                                                                                                                                                                                                                                                                                                                                                                            |         |
|                              |         | (d) <i>Cohort study</i> —If applicable, explain how loss to follow-up was addressed<br><i>Case-control study</i> —If applicable, explain how matching of cases and controls was addressed<br><i>Cross-sectional study</i> —If applicable, describe analytical methods taking account of sampling strategy                                                                                                                                                              |         |
|                              |         | (e) Describe any sensitivity analyses                                                                                                                                                                                                                                                                                                                                                                                                                                  |         |

1  
2  
3  
4  
5  
6  
7  
8  
9  
10  
11  
12  
13  
14  
15  
16  
17  
18  
19  
20  
21  
22  
23  
24  
25  
26  
27  
28  
29  
30  
31  
32  
33  
34  
35  
36  
37  
38  
39  
40  
41  
42  
43  
44  
45  
46  
47  
48  
49  
50  
51  
52  
53  
54  
55  
56  
57  
58  
59  
60**Results**

|                   |     |                                                                                                                                                                                                                                                                                                                                                                                                               |    |
|-------------------|-----|---------------------------------------------------------------------------------------------------------------------------------------------------------------------------------------------------------------------------------------------------------------------------------------------------------------------------------------------------------------------------------------------------------------|----|
| Participants      | 13* | (a) Report numbers of individuals at each stage of study—eg numbers potentially eligible, examined for eligibility, confirmed eligible, included in the study, completing follow-up, and analysed<br>(b) Give reasons for non-participation at each stage<br>(c) Consider use of a flow diagram                                                                                                               |    |
| Descriptive data  | 14* | (a) Give characteristics of study participants (eg demographic, clinical, social) and information on exposures and potential confounders<br>(b) Indicate number of participants with missing data for each variable of interest<br>(c) <i>Cohort study</i> —Summarise follow-up time (eg, average and total amount)                                                                                           |    |
| Outcome data      | 15* | <i>Cohort study</i> —Report numbers of outcome events or summary measures over time<br><i>Case-control study</i> —Report numbers in each exposure category, or summary measures of exposure<br><i>Cross-sectional study</i> —Report numbers of outcome events or summary measures                                                                                                                             |    |
| Main results      | 16  | (a) Give unadjusted estimates and, if applicable, confounder-adjusted estimates and their precision (eg, 95% confidence interval). Make clear which confounders were adjusted for and why they were included<br>(b) Report category boundaries when continuous variables were categorized<br>(c) If relevant, consider translating estimates of relative risk into absolute risk for a meaningful time period |    |
| Other analyses    | 17  | Report other analyses done—eg analyses of subgroups and interactions, and sensitivity analyses                                                                                                                                                                                                                                                                                                                |    |
| <b>Discussion</b> |     |                                                                                                                                                                                                                                                                                                                                                                                                               |    |
| Key results       | 18  | Summarise key results with reference to study objectives                                                                                                                                                                                                                                                                                                                                                      |    |
| Limitations       | 19  | Discuss limitations of the study, taking into account sources of potential bias or imprecision. Discuss both direction and magnitude of any potential bias                                                                                                                                                                                                                                                    | 13 |
| Interpretation    | 20  | Give a cautious overall interpretation of results considering objectives, limitations,                                                                                                                                                                                                                                                                                                                        |    |

|                          |    |                                                                                                                                                               |    |
|--------------------------|----|---------------------------------------------------------------------------------------------------------------------------------------------------------------|----|
|                          |    | multiplicity of analyses, results from similar studies, and other relevant evidence                                                                           |    |
| Generalisability         | 21 | Discuss the generalisability (external validity) of the study results                                                                                         |    |
| <b>Other information</b> |    |                                                                                                                                                               |    |
| Funding                  | 22 | Give the source of funding and the role of the funders for the present study and, if applicable, for the original study on which the present article is based | 15 |

\*Give information separately for cases and controls in case-control studies and, if applicable, for exposed and unexposed groups in cohort and cross-sectional studies.

**Note:** An Explanation and Elaboration article discusses each checklist item and gives methodological background and published examples of transparent reporting. The STROBE checklist is best used in conjunction with this article (freely available on the Web sites of PLoS Medicine at <http://www.plosmedicine.org/>, Annals of Internal Medicine at <http://www.annals.org/>, and Epidemiology at <http://www.epidem.com/>). Information on the STROBE Initiative is available at [www.strobe-statement.org](http://www.strobe-statement.org).

# BMJ Open

## Suicide, other externally caused injuries, and cardiovascular death following a cancer diagnosis: study protocol for a nationwide population-based study in Japan

|                                 |                                                                                                                                                                                                                                                                                                                                                                                                                                                                                                                                                                                                                                                                                                                                                                                                                                                                                                                                                                                                                                                                                                                                                                                                                                                                                                                                                                                                                                                                                                                                                                                                                                                                                                                                                                                                                 |
|---------------------------------|-----------------------------------------------------------------------------------------------------------------------------------------------------------------------------------------------------------------------------------------------------------------------------------------------------------------------------------------------------------------------------------------------------------------------------------------------------------------------------------------------------------------------------------------------------------------------------------------------------------------------------------------------------------------------------------------------------------------------------------------------------------------------------------------------------------------------------------------------------------------------------------------------------------------------------------------------------------------------------------------------------------------------------------------------------------------------------------------------------------------------------------------------------------------------------------------------------------------------------------------------------------------------------------------------------------------------------------------------------------------------------------------------------------------------------------------------------------------------------------------------------------------------------------------------------------------------------------------------------------------------------------------------------------------------------------------------------------------------------------------------------------------------------------------------------------------|
| Journal:                        | <i>BMJ Open</i>                                                                                                                                                                                                                                                                                                                                                                                                                                                                                                                                                                                                                                                                                                                                                                                                                                                                                                                                                                                                                                                                                                                                                                                                                                                                                                                                                                                                                                                                                                                                                                                                                                                                                                                                                                                                 |
| Manuscript ID                   | bmjopen-2019-030681.R1                                                                                                                                                                                                                                                                                                                                                                                                                                                                                                                                                                                                                                                                                                                                                                                                                                                                                                                                                                                                                                                                                                                                                                                                                                                                                                                                                                                                                                                                                                                                                                                                                                                                                                                                                                                          |
| Article Type:                   | Protocol                                                                                                                                                                                                                                                                                                                                                                                                                                                                                                                                                                                                                                                                                                                                                                                                                                                                                                                                                                                                                                                                                                                                                                                                                                                                                                                                                                                                                                                                                                                                                                                                                                                                                                                                                                                                        |
| Date Submitted by the Author:   | 06-Jun-2019                                                                                                                                                                                                                                                                                                                                                                                                                                                                                                                                                                                                                                                                                                                                                                                                                                                                                                                                                                                                                                                                                                                                                                                                                                                                                                                                                                                                                                                                                                                                                                                                                                                                                                                                                                                                     |
| Complete List of Authors:       | <p>Harashima, Saki; National Cancer Center Japan, Division of Health Care Research, Behavioral Science and Survivorship Research Group, Center for Public Health Sciences; The University of Tokyo Graduate School of Medicine, Department of Stress Sciences and Psychosomatic Medicine</p> <p>Fujimori, Maiko; National Cancer Center Japan, Division of Health Care Research, Behavioral Science and Survivorship Research Group, Center for Public Health Sciences</p> <p>Akechi, Tatsuo; Nagoya City University Graduate School of Medical Sciences, Department of Psychiatry and Cognitive-Behavioral Medicine</p> <p>Matsuda, Tomohiro; National Cancer Center Japan, Center for Cancer Registries, Center for Cancer Control and Information Services</p> <p>Saika, Kumiko; National Cancer Center Japan, Center for Cancer Registries, Center for Cancer Control and Information Services</p> <p>Hasegawa, Takaaki; Nagoya City University Hospital, Division of Psycho-oncology and Palliative Care</p> <p>Inoue, Keisuke; National Cancer Center Japan, Division of Health Care Research, Behavioral Science and Survivorship Research Group, Center for Public Health Sciences; Yokohama City University School of Medicine, Department of Psychiatry</p> <p>Yoshiuchi, Kazuhiro; The University of Tokyo Graduate School of Medicine, Department of Stress Sciences and Psychosomatic Medicine</p> <p>Miyashiro, Isao; Osaka International Cancer Institute, Cancer Control Center</p> <p>Uchitomi, Yosuke; National Cancer Center Hospital, Innovation Center for Supportive, Palliative and Psychosocial Care</p> <p>Matsuoka, Yutaka; National Cancer Center Japan, Division of Health Care Research, Behavioral Science and Survivorship Research Group, Center for Public Health Sciences</p> |
| <b>Primary Subject Heading</b>: | Oncology                                                                                                                                                                                                                                                                                                                                                                                                                                                                                                                                                                                                                                                                                                                                                                                                                                                                                                                                                                                                                                                                                                                                                                                                                                                                                                                                                                                                                                                                                                                                                                                                                                                                                                                                                                                                        |
| Secondary Subject Heading:      | Epidemiology, Mental health, Cardiovascular medicine                                                                                                                                                                                                                                                                                                                                                                                                                                                                                                                                                                                                                                                                                                                                                                                                                                                                                                                                                                                                                                                                                                                                                                                                                                                                                                                                                                                                                                                                                                                                                                                                                                                                                                                                                            |
| Keywords:                       | neoplasms, suicide, cardiovascular diseases, registries, standardized mortality ratio                                                                                                                                                                                                                                                                                                                                                                                                                                                                                                                                                                                                                                                                                                                                                                                                                                                                                                                                                                                                                                                                                                                                                                                                                                                                                                                                                                                                                                                                                                                                                                                                                                                                                                                           |
|                                 |                                                                                                                                                                                                                                                                                                                                                                                                                                                                                                                                                                                                                                                                                                                                                                                                                                                                                                                                                                                                                                                                                                                                                                                                                                                                                                                                                                                                                                                                                                                                                                                                                                                                                                                                                                                                                 |

1  
2  
3  
4  
5  
6  
7  
8  
9  
10  
11  
12  
13  
14  
15  
16  
17  
18  
19  
20  
21  
22  
23  
24  
25  
26  
27  
28  
29  
30  
31  
32  
33  
34  
35  
36  
37  
38  
39  
40  
41  
42  
43  
44  
45  
46  
47  
48  
49  
50  
51  
52  
53  
54  
55  
56  
57  
58  
59  
60

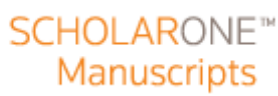



1  
2  
3  
4  
5  
6 **Title**  
7

8  
9  
10 2 Suicide, other externally caused injuries, and cardiovascular death following a cancer  
11  
12 3 diagnosis: study protocol for a nationwide population-based study in Japan  
13  
14

15  
16 4  
17  
18 5 Saki Harashima<sup>1, 2</sup>, Maiko Fujimori<sup>1</sup>, Tatsuo Akechi<sup>3</sup>, Tomohiro Matsuda<sup>4</sup>, Kumiko  
19  
20  
21 6 Saika<sup>4</sup>, Takaaki Hasegawa<sup>5</sup>, Keisuke Inoue<sup>1, 6</sup>, Kazuhiro Yoshiuchi<sup>2</sup>, Isao Miyashiro<sup>7</sup>,  
22  
23  
24 7 Yosuke Uchitomi<sup>8</sup>, Yutaka J. Matsuoka<sup>1</sup>.  
25  
26

27  
28  
29  
30 **Author affiliations**  
31

32  
33 10 1) Division of Health Care Research, Behavioral Science and Survivorship Research  
34  
35  
36 11 Group, Center for Public Health Sciences, National Cancer Center Japan, 5-1-1 Tsukiji,  
37  
38  
39 12 Chuo-ku, Tokyo 104-0045, Japan.  
40

41  
42 13 2) Department of Stress Sciences and Psychosomatic Medicine, The University of  
43  
44  
45 14 Tokyo Graduate School of Medicine, Tokyo, Japan.  
46  
47

48  
49 15 3) Department of Psychiatry and Cognitive-Behavioral Medicine, Nagoya City  
50  
51  
52 16 University Graduate School of Medical Sciences, Nagoya, Japan.  
53

54  
55 17 4) Center for Cancer Registries, Center for Cancer Control and Information Services,  
56  
57  
58 18 National Cancer Center Japan, Tokyo, Japan.  
59  
60

1  
2  
3  
4  
5  
6 19 5) Division of Psycho-oncology and Palliative Care, Nagoya City University Hospital,  
7  
8

9 20 Nagoya, Japan.  
10  
11

12 21 6) Department of Psychiatry, Yokohama City University School of Medicine,  
13  
14

15 22 Yokohama, Japan.  
16  
17

18 23 7) Cancer Control Center, Osaka International Cancer Institute, Osaka, Japan.  
19  
20

21 24 8) Innovation Center for Supportive, Palliative and Psychosocial Care, National Cancer  
22  
23

24 25 Center Hospital, Tokyo, Japan.  
25  
26

27 26  
28  
29

30 27 Corresponding author: Maiko Fujimori, postal address: Division of Health Care  
31  
32

33 28 Research, Behavioral Science and Survivorship Research Group, Center for Public  
34  
35

36 29 Health Sciences, National Cancer Center Japan, 5-1-1 Tsukiji, Chuo-ku, Tokyo  
37  
38

39 30 104-0045, Japan. e-mail address: mfujimor@ncc.go.jp, telephone number:  
40  
41

42 31 +81-3-3547-5201.  
43  
44

45 32 Word Count: 2,587 words  
46  
47

48 33 Keywords: neoplasms, suicide, cardiovascular diseases, registries, standardized  
49  
50

51 34 mortality ratio  
52  
53

54 35  
55  
56  
57  
58  
59  
60

1  
2  
3  
4  
5  
6  
7  
8  
9  
10  
11  
12  
13  
14  
15  
16  
17  
18  
19  
20  
21  
22  
23  
24  
25  
26  
27  
28  
29  
30  
31  
32  
33  
34  
35  
36  
37  
38  
39  
40  
41  
42  
43  
44  
45  
46  
47  
48  
49  
50  
51  
52  
53  
54  
55  
56  
57  
58  
59  
60

36 **Abstract**

37 **Introduction:** A growing body of literature has demonstrated that cancer patients have  
38 a higher risk of suicide and cardiovascular mortality compared with the general  
39 population, especially immediately after a cancer diagnosis. Using data from the  
40 National Cancer Registry (NCR) in Japan launched in January 2016, we will conduct  
41 the first nationwide population-based study in Japan to compare incidence of death by  
42 suicide, other externally caused injuries (ECIs), and cardiovascular disease following a  
43 cancer diagnosis with that of the general population in Japan. We will also aim to  
44 identify the patient subgroups and time periods associated with particularly high risk.

45 **Methods and analysis:** Our study subjects will consist of cancer cases diagnosed  
46 between 1 January 2016 and 31 December 2016 in Japan and they will be observed until  
47 31 December 2018. We will calculate standardized mortality ratios (SMRs) and excess  
48 absolute risks (EARs) for suicide, other ECIs, and cardiovascular death compared with  
49 the general population in Japan, after adjustment for sex, age, and prefecture. SMRs and  
50 EARs will be calculated separately in relation to a number of factors: sex; age at  
51 diagnosis; time since cancer diagnosis; prefecture of residence at diagnosis; primary  
52 tumor site; behavior code of tumor; extension of tumor; whether definitive surgery of  
53 the primary site was performed; and presence/absence of multiple primary tumors.

1  
2  
3  
4  
5  
6  
7 54 **Ethics and dissemination:** The study protocol was approved by the institutional review  
8  
9  
10 55 board and ethics committee of the National Cancer Center Japan and Nagoya City  
11  
12 56 University Graduate School of Medical Sciences. The findings will be disseminated  
13  
14  
15 57 through peer-reviewed publications and conference presentations.  
16  
17

18 58 **Registration number:** UMIN000035118  
19  
20  
21  
22 59

#### 23 24 60 **Strengths and limitations of this study**

- 25  
26  
27 61 • This will be the first nationwide population-based study in Japan to investigate the  
28  
29  
30 62 impact of a cancer diagnosis on subsequent death by suicide, other externally caused  
31  
32  
33 63 injuries, and cardiovascular events.  
34  
35  
36 64 • Our study will cover virtually all cancer incidence and subsequent fatal outcomes in  
37  
38  
39 65 Japan.  
40  
41  
42 66 • Our study will not be able to control for potential confounding factors for cancer,  
43  
44  
45 67 suicide, and cardiovascular events, such as smoking history and alcohol use,  
46  
47  
48 68 sociodemographic status, and pre-existing medical and psychiatric conditions.  
49  
50

51 69

#### 52 53 54 70 **Introduction**

55  
56  
57 71 In Japan, it is estimated that approximately 1 million people have been newly diagnosed  
58  
59  
60

1  
2  
3  
4  
5  
6 72 with cancer annually in recent years, and about 1 in 2 Japanese will receive a cancer  
7  
8  
9 73 diagnosis during their lifetime.[1]  
10  
11

12 74 Receiving a cancer diagnosis and undergoing diagnostic workup leading to a definite  
13  
14  
15 75 cancer diagnosis are highly stressful experiences for cancer patients, and a high  
16  
17  
18 76 prevalence of psychiatric symptoms and disorders has been observed around the time of  
19  
20  
21 77 a cancer diagnosis.[2, 3] A number of population-based studies have consistently  
22  
23  
24 78 demonstrated that patients with cancer are at increased risk for suicide,[4-15] especially  
25  
26  
27 79 in the weeks after their cancer diagnosis.[16-19] A high incidence of other externally  
28  
29  
30 80 caused injuries (ECIs), including accidental death and death due to events of  
31  
32  
33 81 undetermined intent, has also been reported among cancer patients.[20-22] Some  
34  
35  
36 82 suicide deaths may be misclassified as other ECIs,[23, 24] and physical, psychological,  
37  
38  
39 83 and social impairment due to cancer itself or adverse effects of cancer treatment could  
40  
41  
42 84 increase the risk of accidental death.[25]  
43  
44

45 85 Furthermore, a few population-based studies have demonstrated that the period  
46  
47  
48 86 immediately after a cancer diagnosis is related to elevated mortality from cardiovascular  
49  
50  
51 87 causes among patients with prostate cancer[26, 27] and those with other cancer types as  
52  
53  
54 88 well.[17] Acute psychological stressors, such as earthquakes, war, and the death of a  
55  
56  
57 89 loved one, are known to trigger cardiovascular events.[28-31] Acute emotional distress  
58  
59  
60

1  
2  
3  
4  
5  
6  
7  
8  
9  
10  
11  
12  
13  
14  
15  
16  
17  
18  
19  
20  
21  
22  
23  
24  
25  
26  
27  
28  
29  
30  
31  
32  
33  
34  
35  
36  
37  
38  
39  
40  
41  
42  
43  
44  
45  
46  
47  
48  
49  
50  
51  
52  
53  
54  
55  
56  
57  
58  
59  
60

90 induced by a cancer diagnosis may also affect cardiovascular functioning and cause  
91 critical outcomes beyond the influence of cancer itself or cancer treatment. Possible  
92 mechanisms linking acute psychological stressors to cardiovascular events include  
93 pathophysiological pathways that have the potential to cause rupture of vulnerable  
94 plaque, thrombosis formation, or fatal arrhythmias (e.g., increased sympathetic tone,  
95 blood pressure, shear stress, and blood viscosity; endothelial dysfunction; and  
96 hypercoagulability), and health-impairing behaviors related to emotional distress.[28.  
97 29]

98 Suicide risk among persons with cancer has been suggested to differ between  
99 different ethnic and cultural groups.[32] Two previous studies have reported risk of  
100 suicide among Japanese patients with cancer compared with the general population.[22,  
101 33] The first, a single-institution study demonstrated that suicide risk among patients  
102 newly diagnosed with cancer was significantly elevated within the first year after a  
103 diagnosis.[33] The second, a population-based prospective study investigating Japanese  
104 residents including over 10,000 cancer patients, showed that risk of death by suicide and  
105 other ECIs was about 24 and 19 times higher, respectively, among those with cancer  
106 within the first year after a cancer diagnosis than among those without cancer.[22]  
107 There has been no nationwide study examining the risk of suicide among cancer

1  
2  
3  
4  
5  
6 108 patients in Japan, and cardiovascular mortality risk following a cancer diagnosis has not  
7  
8  
9 109 been investigated in countries other than Sweden and the United States. As Japan is  
10  
11  
12 110 aging faster than any other country in the world and the number of patients with newly  
13  
14  
15 111 diagnosed cancer is expected to keep increasing,[34] the impact of a cancer diagnosis on  
16  
17  
18 112 subsequent stress-related outcomes is a serious public health issue. It is necessary to  
19  
20  
21 113 identify vulnerable patients and the window of maximum risk in order to implement  
22  
23  
24 114 appropriate supportive and preventive intervention.  
25  
26

27 115 The Act on Promotion of Cancer Registries was enacted in Japan in 2013 and the  
28  
29  
30 116 National Cancer Registry (NCR) in Japan was launched on 1 January 2016.[35, 36]  
31  
32  
33 117 According to the Act, hospitals in Japan have a legal duty to report all targeted cancer  
34  
35  
36 118 cases (i.e. intraepithelial and malignant tumors corresponding to a behavioral code of 2  
37  
38  
39 119 or 3 in the International Classification of Diseases for Oncology, Third Edition  
40  
41  
42 120 (ICD-O-3); benign and uncertain whether benign or malignant central nervous system  
43  
44  
45 121 (CNS) neoplasms and gastrointestinal stromal tumors; and some types of ovarian  
46  
47  
48 122 borderline malignant tumors) to the NCR. The NCR has enabled hospitals to calculate  
49  
50  
51 123 accurate cancer incidences and survival rates, and it is expected that the NCR database  
52  
53  
54 124 will contribute to planning and assessment of evidence-based cancer control policies  
55  
56  
57 125 and promote research in such areas as evaluation of cancer care quality and follow-up  
58  
59  
60

1  
2  
3  
4  
5  
6 126 surveys in nationwide cohort studies. The first NCR data will become available for  
7  
8  
9 127 research purposes in 2019.  
10

11  
12 128 Using data from the NCR, we will conduct the first nationwide population-based  
13  
14  
15 129 study in Japan to characterize the incidence of death by suicide, ECIs, and  
16  
17  
18 130 cardiovascular disease among patients with a cancer diagnosis compared with the  
19  
20  
21 131 general population in Japan. We will also aim to identify higher-risk patients and time  
22  
23  
24 132 periods that may require more attention. We hypothesize that the risk of suicide, other  
25  
26  
27 133 ECIs, and cardiovascular death is significantly higher within the first year after a cancer  
28  
29  
30 134 diagnosis and that the period soon after a cancer diagnosis is associated with the  
31  
32  
33 135 greatest risk.  
34

35  
36 136  
37  
38

## 39 137 **Methods**

### 40 41 42 138 **Data sources**

43  
44  
45 139 Cancer patients will be identified from the NCR database in Japan. The NCR covers the  
46  
47  
48 140 total population in Japan, and hospitals are required to report all targeted cancer cases  
49  
50  
51 141 newly diagnosed in their institutions from 1 January 2016 onward, irrespective of  
52  
53  
54 142 patient nationality. The NCR system in Japan is described in Figure 1. Incidence data  
55  
56  
57 143 from cancer care hospitals are submitted to prefectural governors and prefectural  
58  
59  
60



1  
2  
3  
4  
5  
6 144 governors review and match record in their prefecture and enter the data in the NCR  
7  
8  
9 145 database in the Ministry of Health, Labour and Welfare (MHLW) (National Cancer  
10  
11  
12 146 Center (NCC)). The MHLW /NCC matches the cancer registry data inter-prefectually  
13  
14  
15 147 and information from death certificate on cancer disease is matched with the incidence  
16  
17  
18 148 data in the NCR. The NCC follows up cancer patients in the NCR database by linking to  
19  
20  
21 149 national death certificate data and registers death information in the NCR. The unit of  
22  
23  
24 150 registration is tumor, duplications of the same cancer case are corrected, and each  
25  
26  
27 151 cancer is registered separately for cases in which a patient is judged to have multiple  
28  
29  
30 152 primary cancers based on pathology. Data aggregation is based on name, birth date, and  
31  
32  
33 153 address of patients. The data collection deadline for each year's cases is the end of the  
34  
35  
36 154 following year, and the data will become available for research purposes the year after  
37  
38  
39 155 that. Data quality of the NCR for year 2016 cases has been reported to be very high: the  
40  
41  
42 156 proportion of Death Certificate Notification (DCN) was 4.5%, the proportion of Death  
43  
44  
45 157 Certificate Only (DCO) was 3.2%, the mortality incidence (M/I) ratio was 0.37, and the  
46  
47  
48 158 morphological verification (MV) proportion was 85.4%.[37]

51 159 The standard items submitted to the NCR by cancer care hospitals are presented in  
52  
53  
54 160 Table 1. The date of cancer diagnosis is defined as the date of the most definitive  
55  
56  
57 161 diagnostic test before initiation of treatment and diagnostic tests are arranged  
58  
59  
60

1  
2  
3  
4  
5  
6 162 hierarchically by levels of definitiveness as follows: histopathologic testing of primary  
7  
8  
9 163 tumor, histopathologic testing of metastatic tumor, cytology, certain kind of tumor  
10  
11  
12 164 specific markers, other clinical testing, and clinical diagnosis.[38] Information such as  
13  
14  
15 165 race, educational status, marital status, income, insurance status, and comorbidity is not  
16  
17  
18 166 registered in the NCR database.

19  
20  
21 167 Details of the NCR system have been described previously.[35, 36]  
22  
23

24 168

### 25 26 27 169 **Study population and inclusion criteria**

28  
29  
30 170 Our study cohort will consist of all cancer cases diagnosed in Japan between 1 January  
31  
32  
33 171 2016 and 31 December 2016 and registered in the NCR and they will be followed until  
34  
35  
36 172 31 December 2018. We will exclude cancer cases that are diagnosed incidentally at  
37  
38  
39 173 autopsy, reported only on a death certificate, or missing a diagnosis date. For  
40  
41  
42 174 individuals with multiple cancers, the start of the at-risk period will be defined as the  
43  
44  
45 175 date of the most recent cancer diagnosis. A total of 995,132 malignant cancer cases  
46  
47  
48 176 (defined by C00-C96 according to International Classification of Diseases, 10th Edition  
49  
50  
51 177 (ICD-10)) were diagnosed in Japan in 2016,[37] and about 1 million cancer patients will  
52  
53  
54 178 be included in our study.

55  
56  
57 179  
58  
59  
60

## 180 **Study variables**

181 We will identify cancer patients who died by suicide, ECIs, and cardiovascular causes  
182 based on underlying cause of death according to ICD-10 registered in the NCR  
183 database. Outcomes will be classified as follows: suicide (X60-X84 and Y87.0), other  
184 ECIs (V01-X59 and Y10-Y34), and cardiovascular diseases (I00-I99). Cardiovascular  
185 death will be further subcategorized as myocardial infarction (I21-I24), other disease of  
186 the heart (I10-I13, I71, and I72), embolism or thrombosis (I26, I74, I80.1, I81, I82, and  
187 I85.0), stroke (I60-I64), hemorrhagic stroke (I60-I62), ischemic stroke (I63), and others.  
188 Quality of cause of death information in Japan has been reported to be high.[39] Other  
189 information we will obtain from the NCR includes sex, age at diagnosis, prefecture of  
190 residence at diagnosis, presence/absence of multiple primary tumors, primary site of  
191 tumor according to ICD-10 codes, basis of diagnosis, date of diagnosis, extension of  
192 tumor, presence/absence of each treatment, presence/absence of definitive surgery of the  
193 primary site, hospital region, survival status, and survival time.

194

## 195 **Statistical analysis**

196 Person-years at risk will be computed from the date of a cancer diagnosis to the date of  
197 death, or December 31 2018, whichever comes first. Standardized mortality ratios

1  
2  
3  
4  
5  
6 198 (SMRs) will be calculated as the observed numbers of targeted events (i.e. suicide, other  
7  
8  
9 199 ECIs, or cardiovascular death) among cancer patients divided by the expected numbers  
10  
11  
12 200 of events in the general population. Excess absolute risks (EARs) will be calculated by  
13  
14  
15 201 subtracting the expected numbers of events from the observed numbers of events; the  
16  
17  
18 202 difference will be then divided by person-years of cancer patients, and the number of  
19  
20  
21 203 events in excess will be expressed per 10,000 person-years. The expected numbers of  
22  
23  
24 204 events will be obtained by multiplying the number of person-years at risk, stratified by  
25  
26  
27 205 sex, age group (0-4, 5-9, ..., 80-84,  $\geq 85$  years), prefecture, and calendar year, by  
28  
29  
30 206 mortality rates from targeted events in each year in the general population in Japan in  
31  
32  
33 207 each corresponding stratum. We will calculate mortality rates by sex, age, and  
34  
35  
36 208 prefecture in each year in the general population by dividing the numbers of death from  
37  
38  
39 209 each event occurring in Japan (based on datasets from Vital Statics Japan, provided by  
40  
41  
42 210 the MHLW) by the estimated total population in Japan based on Population  
43  
44  
45 211 Estimates.[40] The numbers of death by each targeted event in the general population  
46  
47  
48 212 will be calculated by using the same definition according to ICD-10 codes as those used  
49  
50  
51 213 in the cancer patients. We will calculate 95% confidence intervals (CIs) of SMRs and  
52  
53  
54 214 EARs by assuming that the observed numbers of events follow a Poisson distribution.  
55  
56  
57 215 SMRs and EARs will be calculated separately in relation to a number of factors:  
58  
59  
60

1  
2  
3  
4  
5  
6 216 sex, age at diagnosis, time since cancer diagnosis, prefecture of residence at diagnosis,  
7  
8  
9 217 primary tumor site, behavioral code of tumor, extension of tumor, whether definitive  
10  
11  
12 218 surgery of the primary site was performed, and presence/absence of multiple tumor. Age  
13  
14  
15 219 at diagnosis will be stratified into the following groups: 0-39, 40-49, 50-59, 60-69,  
16  
17  
18 220 70-79, and  $\geq 80$  years. Time after a cancer diagnosis will be divided into 0 to 2 months,  
19  
20  
21 221 3 to 5 months, 6 to 11 months, and  $\geq 12$  months for suicide and other ECIs. Risk of  
22  
23  
24 222 suicide and other ECIs during the first week after diagnosis will be also separately  
25  
26  
27 223 calculated. For cardiovascular death, we will investigate  $< 1$  week, 1 week to  $< 1$  month,  
28  
29  
30 224 1 to 5 months, 6 to 11 months, and  $\geq 12$  months. Primary tumor site will be based on the  
31  
32  
33 225 classifications used in the MCIJ project (Table 2).[41] The extension of tumor will be  
34  
35  
36 226 classified into localized (confined to the original organ), regional (spread to regional  
37  
38  
39 227 lymph nodes and/or adjacent tissue), metastatic (metastasized to distant organ), and  
40  
41  
42 228 unknown. Stroke will be excluded from cardiovascular mortality in the analysis of CNS  
43  
44  
45 229 tumors, and CNS tumors will be excluded from “any cancer” in the analysis of death  
46  
47  
48 230 from cardiovascular causes.[17] Cases of hematologic disease will be excluded in the  
49  
50  
51 231 analysis of presence/absence of definitive surgery. Likelihood ratio tests based on  
52  
53  
54 232 Poisson regression models will be conducted to test for heterogeneity. All  $p$ -value will  
55  
56  
57 233 be two-sided tests and be considered to be statistically significant at a  $p$ -value of less  
58  
59  
60

1  
2  
3  
4  
5  
6 234 than 0.05. We will also perform multivariable regression analysis based on Poisson  
7  
8  
9 235 regression models to adjust for following factors: sex, age at a cancer diagnosis, primary  
10  
11  
12 236 tumor site, extension of tumor, presence/absence of multiple tumors, and follow-up  
13  
14  
15 237 period. All factors will be included in the multivariable regression model with no  
16  
17  
18 238 interaction terms. We will also test for the heterogeneity from the multivariable models.  
19

20  
21 239 In order to explore the factors affecting their choice of suicide method by cancer  
22  
23  
24 240 patients we will describe distribution of characteristics of patients and tumors (e.g. sex,  
25  
26  
27 241 age at diagnosis, extension of tumor, and time since diagnosis) by common suicide  
28  
29  
30 242 methods in Japan (e.g. poisoning (X60-X69), hanging (X70), and jumping from heights  
31  
32  
33 243 (X80)).  
34

35  
36 244 We will also divide cancer patients who die during the observation period into 2  
37  
38  
39 245 groups according to the main cause of death: (1) suicide, other ECIs, and cardiovascular  
40  
41  
42 246 diseases, and (2) others. Characteristics of patients and tumors will be compared  
43  
44  
45 247 between two groups.  
46

47  
48 248 All analyses will be performed using SPSS Statistics for Windows, Version 25.0  
49  
50  
51 249 (Armonk, NY: IBM Corp).  
52

53  
54 250

55  
56  
57 251 **Discussion**  
58  
59  
60

1  
2  
3  
4  
5  
6 252 This will be the first nationwide study in Japan to investigate the impact of a cancer  
7  
8  
9 253 diagnosis on subsequent death by suicide, other ECIs, and cardiovascular events. The  
10  
11  
12 254 main strength of this study is that it will cover virtually all cancer incidence and  
13  
14  
15 255 subsequent fatal outcomes in Japan using information registered in the NCR. SMRs and  
16  
17  
18 256 EARs of stress-related outcomes after a cancer diagnosis will help to identify  
19  
20  
21 257 higher-risk patients and time periods, and will provide useful evidence for considering  
22  
23  
24 258 the priority of preventive strategies.

25  
26  
27 259 Several limitations inherent in this study should be acknowledged. First, our study  
28  
29  
30 260 will not be able to control for potential confounding factors for cancer, suicide, and  
31  
32  
33 261 cardiovascular events, such as smoking history and alcohol use, sociodemographic  
34  
35  
36 262 status, and pre-existing medical and psychiatric conditions. These data are not collected  
37  
38  
39 263 in the NCR and we cannot link anonymous cancer registry information to other medical  
40  
41  
42 264 and socioeconomic databases. Second, our study will explore mortality outcomes alone  
43  
44  
45 265 and we cannot capture nonfatal outcomes, such as suicidal ideation, attempted suicide,  
46  
47  
48 266 and nonlethal cardiovascular events. Our findings will represent only a small portion of  
49  
50  
51 267 the psychological burden associated with a cancer diagnosis. Third, some deaths  
52  
53  
54 268 classified as other ECIs may be misclassification of deaths due to suicide,[23, 24] and  
55  
56  
57 269 assuming that more under-reporting of suicide occurs in cancer patients than in the  
58  
59  
60

1  
2  
3  
4  
5  
6 270 general population, risk of suicide among cancer patients in our study will be potentially  
7  
8  
9 271 underestimated. Fourth, in the analysis of presence/absence of definitive surgery of the  
10  
11  
12 272 primary tumor, the result should be interpreted with caution because only patients who  
13  
14  
15 273 did not die by targeted outcomes and survived until surgery could undergo surgery.  
16  
17  
18 274 Finally, if death ascertainment in the NCR system is incomplete, risk of deaths by  
19  
20  
21 275 targeted causes among cancer patients can be underestimated.  
22

23  
24  
25 276

26  
27 277 **Article Summary**

28  
29  
30 278 **Patient and public involvement**

31  
32  
33 279 Patients and/or public were not involved.  
34

35  
36  
37 280

38  
39 281 **Ethics and dissemination**

40  
41  
42 282 The study protocol was approved by the institutional review board and ethics committee  
43  
44  
45 283 of the National Cancer Center Japan and Nagoya City University Graduate School of  
46  
47  
48 284 Medical Sciences. The Act on Promotion of Cancer Registries does not require  
49  
50  
51 285 informed consent for the provision of anonymous information, and the requirement for  
52  
53  
54 286 opt-out will be waived because no personal identifiable information will be accessed.  
55  
56  
57 287 The findings will be disseminated through peer-reviewed publications and conference  
58  
59  
60



1  
2  
3  
4  
5  
6 288 presentations.  
7  
8

9 289  
10

## 11 290 **Acknowledgement**

12  
13  
14  
15 291 This study is reviewed and supported by the Japan Supportive, Palliative and  
16  
17  
18 292 Psychosocial Oncology Group (J-SUPPORT) in terms of the adequacy of the research  
19  
20  
21 293 involved, and approved as J-SUPPORT 1902.  
22

23  
24 294

## 25 26 27 295 **Footnotes**

## 28 29 30 296 **Author Contributions**

31  
32  
33 297 SH, MF, TA, TM, KS, TH, KI, KY, IM, YU, and YM contributed to the study  
34  
35  
36 298 conception and design. TM and KS advised on statistical analysis and management of  
37  
38  
39 299 the database. TA and YU supervised the project. SH and MF will perform the data  
40  
41  
42 300 analysis and all coauthors will be involved in interpretation of the data. SH and MF  
43  
44  
45 301 wrote the first draft of the manuscript and all coauthors reviewed the manuscript and  
46  
47  
48 302 provided critical revisions. All authors have approved the final version of the  
49  
50  
51 303 manuscript.  
52

## 53 54 304 **Funding**

55  
56  
57 305 This work is supported by the Innovative Research Program on Suicide  
58  
59  
60

1  
2  
3  
4  
5  
6 306 Countermeasures (IRPSC) (1-2), Japan Support Center for Suicide Countermeasures  
7  
8  
9 307 (JSSC), National Center of Neurology and Psychiatry (NCNP). The funders had no role  
10  
11  
12 308 in study design, data collection and analysis, decision to publish, or preparation of the  
13  
14  
15 309 manuscript.

16  
17  
18 310

19  
20  
21 311 **Competing interests**

22  
23  
24 312 None declared.  
25  
26  
27  
28  
29  
30  
31  
32  
33  
34  
35  
36  
37  
38  
39  
40  
41  
42  
43  
44  
45  
46  
47  
48  
49  
50  
51  
52  
53  
54  
55  
56  
57  
58  
59  
60

For peer review only

313 **REFERENCES**

- 314 1. Center for Cancer Control and Information Services, National Cancer Center.  
315 Projected Cancer Statistics, 2018.  
316 [https://ganjoho.jp/en/public/statistics/short\\_pred.html](https://ganjoho.jp/en/public/statistics/short_pred.html) (accessed 28 May 2019).
- 317 2. Mitchell AJ, Chan M, Bhatti H, et al. Prevalence of depression, anxiety, and  
318 adjustment disorder in oncological, haematological, and palliative-care settings: a  
319 meta-analysis of 94 interview-based studies. *Lancet Oncol* 2011;12:160-74.
- 320 3. Lu D, Andersson TM, Fall K, et al. Clinical diagnosis of mental disorders  
321 immediately before and after cancer diagnosis: a nationwide matched cohort study in  
322 Sweden. *JAMA Oncol* 2016;2:1188-96.
- 323 4. Harris EC, Barraclough BM. Suicide as an outcome for medical disorders. *Medicine*  
324 (*Baltimore*) 1994;73:281-96.
- 325 5. Robson A, Scrutton F, Wilkinson L, et al. The risk of suicide in cancer patients: a  
326 review of the literature. *Psychooncology* 2010;19:1250-8.
- 327 6. Spoletini I, Gianni W, Caltagirone C, et al. Suicide and cancer: where do we go from  
328 here? *Crit Rev Oncol Hematol* 2011;78:206-19.
- 329 7. Anguiano L, Mayer DK, Piven ML, et al. A literature review of suicide in cancer  
330 patients. *Cancer Nurs* 2012;35:E14-E26.

- 1  
2  
3  
4  
5  
6 331 8. Ahn E, Shin DW, Cho SI, et al. Suicide rates and risk factors among Korean cancer  
7  
8  
9 332 patients, 1993-2005. *Cancer Epidemiol Biomarkers Prev* 2010;19:2097-105.  
10  
11  
12 333 9. Lu D, Fall K, Sparén P, et al. Suicide and suicide attempt after a cancer diagnosis  
13  
14  
15 334 among young individuals. *Ann Oncol* 2013;24:3112-7.  
16  
17  
18 335 10. Oberaigner W, Sperner-Unterweger B, Fiegl M, et al. Increased suicide risk in  
19  
20  
21 336 cancer patients in Tyrol/Austria. *Gen Hosp Psychiatry* 2014;36:483-7.  
22  
23  
24 337 11. Vyssoki B, Gleiss A, Rockett IR, et al. Suicide among 915,303 Austrian cancer  
25  
26  
27 338 patients: Who is at risk? *J Affect Disord* 2015;175:287-91.  
28  
29  
30 339 12. Lin PH, Liao SC, Chen IM, et al. Impact of universal health coverage on suicide risk  
31  
32  
33 340 in newly diagnosed cancer patients: Population-based cohort study from 1985 to  
34  
35  
36 341 2007 in Taiwan. *Psychooncology* 2017;26:1852-9.  
37  
38  
39 342 13. Kaceniene A, Krilaviciute A, Kazlauskiene J, et al. Increasing suicide risk among  
40  
41  
42 343 cancer patients in Lithuania from 1993 to 2012: a cancer registry-based study. *Eur J*  
43  
44  
45 344 *Cancer Prev* 2017;26:S197-S203.  
46  
47  
48 345 14. Saad AM, Gad M, Alkhayat M, et al. Suicidal death within a year of cancer  
49  
50  
51 346 diagnosis; a population-based study. *Cancer* 2019;125:972-9.  
52  
53  
54 347 15. Henson KE, Brock R, Charnock J, et al. Risk of suicide after cancer diagnosis in  
55  
56  
57 348 England. *JAMA Psychiatry* 2019;76:51-60.  
58  
59  
60

- 1  
2  
3  
4  
5  
6  
7 349 16. Hem E, Loge JH, Haldorsen T, et al. Suicide risk in cancer patients from 1960 to  
8  
9 350 1999. *J Clin Oncol* 2004;22:4209-16.  
10  
11  
12 351 17. Fang F, Fall K, Mittleman MA, et al. Suicide and cardiovascular death after a cancer  
13  
14  
15 352 diagnosis. *N Engl J Med* 2012;366:1310-8.  
16  
17  
18 353 18. Johnson TV, Garlow SJ, Brawley OW, et al. Peak window of suicides occurs within  
19  
20  
21 354 the first month of diagnosis: implications for clinical oncology. *Psychooncology*  
22  
23  
24 355 2012;21:351-6.  
25  
26  
27 356 19. Wang SM, Chang JC, Weng SC, et al. Risk of suicide within 1 year of cancer  
28  
29  
30 357 diagnosis. *Int J Cancer* 2018;142:1986-93.  
31  
32  
33 358 20. Kendal WS, Kendal WM. Comparative risk factors for accidental and suicidal death  
34  
35  
36 359 in cancer patients. *Crisis* 2012;33:325-34.  
37  
38  
39 360 21. Dalela D, Krishna N, Okwara J, et al. Suicide and accidental deaths among patients  
40  
41  
42 361 with non-metastatic prostate cancer. *BJU Int* 2016;118:286-97.  
43  
44  
45 362 22. Yamauchi T, Inagaki M, Yonemoto N, et al. Death by suicide and other externally  
46  
47  
48 363 caused injuries following a cancer diagnosis: the Japan Public Health Center-based  
49  
50  
51 364 Prospective Study. *Psychooncology* 2014;23:1034-41.  
52  
53  
54 365 23. Pritchard C, Hean S. Suicide and undetermined deaths among youths and young  
55  
56  
57 366 adults in Latin America: comparison with the 10 major developed countries-a source  
58  
59  
60

- 1  
2  
3  
4  
5  
6 367 of hidden suicides? *Crisis* 2008;29:145-53.  
7  
8  
9 368 24. Rockett IR, Hobbs G, De Leo D, et al. Suicide and unintentional poisoning mortality  
10  
11  
12 369 trends in the United States, 1987-2006: two unrelated phenomena? *BMC Public*  
13  
14  
15 370 *Health* 2010;10:705.  
16  
17  
18 371 25. Bergen H, Hawton K, Kapur N, et al. Shared characteristics of suicides and other  
19  
20  
21 372 unnatural deaths following non-fatal self-harm? A multicentre study of risk factors.  
22  
23  
24 373 *Psychol Med* 2012;42:727-41.  
25  
26  
27 374 26. Fall K, Fang F, Mucci LA, et al. Immediate risk for cardiovascular events and  
28  
29  
30 375 suicide following a prostate cancer diagnosis: prospective cohort study. *PLoS Med*  
31  
32  
33 376 2009;6:e1000197.  
34  
35  
36 377 27. Fang F, Keating NL, Mucci LA, et al. Immediate risk of suicide and cardiovascular  
37  
38  
39 378 death after a prostate cancer diagnosis: cohort study in the United States. *J Natl*  
40  
41  
42 379 *Cancer Inst* 2010;102:307-14.  
43  
44  
45 380 28. Dimsdale JE. Psychological stress and cardiovascular disease. *J Am Coll Cardiol*  
46  
47  
48 381 2008;51:1237-46.  
49  
50  
51 382 29. Schwartz BG, French WJ, Mayeda GS, et al. Emotional stressors trigger  
52  
53  
54 383 cardiovascular events. *Int J Clin Pract* 2012;66:631-9.  
55  
56  
57 384 30. Mostofsky E, Maclure M, Sherwood JB, et al. Risk of acute myocardial infarction  
58  
59  
60

- 1  
2  
3  
4  
5  
6 385 after the death of a significant person in one's life: the determinants of myocardial  
7  
8  
9 386 infarction onset study. *Circulation* 2012;125:491-6.  
10  
11  
12 387 31. Berntson J, Patel JS, Stewart JC. Number of recent stressful life events and incident  
13  
14  
15 388 cardiovascular disease: Moderation by lifetime depressive disorder. *J Psychosom Res*  
16  
17  
18 389 2017;99:149-54.  
19  
20  
21 390 32. Nakash O, Barchana M, Liphshitz I, et al. The effect of cancer on suicide in ethnic  
22  
23  
24 391 groups with a differential suicide risk. *Eur J Public Health* 2013;23:114-5.  
25  
26  
27 392 33. Tanaka H, Tsukuma H, Masaoka T, et al. Suicide risk among cancer patients:  
28  
29  
30 393 experience at one medical center in Japan, 1978-1994. *Jpn J Cancer Res*  
31  
32  
33 394 1999;90:812-7.  
34  
35  
36 395 34. Utada M, Ohno Y, Shimizu S, et al. Cancer incidence and mortality in Osaka, Japan:  
37  
38  
39 396 future trends estimation with an age-period-cohort model. *Asian Pac J Cancer Prev*  
40  
41  
42 397 2012;13:3893-98.  
43  
44  
45 398 35. Matsuda T, Sobue T. Recent trends in population-based cancer registries in Japan:  
46  
47  
48 399 the Act on Promotion of Cancer Registries and drastic changes in the historical  
49  
50  
51 400 registry. *Int J Clin Oncol* 2015;20:11-20.  
52  
53  
54 401 36. Tanaka H, Matsuda T. Arrival of a new era in Japan with the establishment of the  
55  
56  
57 402 Cancer Registration Promotion Act. *Eur J Cancer Prev* 2015;24:542-3.  
58  
59  
60

- 1  
2  
3  
4  
5  
6 403 37. Ministry of Health, Labour and Welfare, Japan. Cancer incidence in Japan in 2016.  
7  
8  
9 404 <https://www.mhlw.go.jp/content/10900000/000468976.pdf> (accessed 28 May 2019)  
10  
11  
12 405 (in Japanese).  
13  
14  
15 406 38. Center for Cancer Control and Information Services, National Cancer Center.  
16  
17  
18 407 Manual for the National Cancer Registry 2016 (2017 revised version).  
19  
20  
21 408 [https://ganjoho.jp/data/reg\\_stat/cancer\\_reg/national/hospital/ncr\\_manual\\_2017rev\\_2](https://ganjoho.jp/data/reg_stat/cancer_reg/national/hospital/ncr_manual_2017rev_2)  
22  
23  
24 409 01901.pdf (accessed 28 May 2019) (in Japanese).  
25  
26  
27 410 39. Mathers CD, Fat DM, Inoue M, et al. Counting the dead and what they died from:  
28  
29  
30 411 an assessment of the global status of cause of death data. *Bull World Health Organ*  
31  
32  
33 412 2005;83:171-7.  
34  
35  
36 413 40. Statistics Bureau, Ministry of the Internal Affairs and Communications, Statistics  
37  
38  
39 414 Japan. Population Estimates, Annual Report.  
40  
41  
42 415 <https://www.e-stat.go.jp/en/stat-search/files?page=1&layout=datalist&toukei=00200>  
43  
44  
45 416 524&tstat=000000090001&cycle=7&month=0&tclass1=000001011679&cycle\_facet  
46  
47  
48 417 =tclass1%3Acycle&second2=1 (accessed 28 May 2019).  
49  
50  
51 418 41. Hori M, Matsuda T, Shibata A, et al. Cancer incidence and incidence rates in Japan  
52  
53  
54 419 in 2009: a study of 32 population-based cancer registries for the Monitoring of  
55  
56  
57 420 Cancer Incidence in Japan (MCIJ) project. *Jpn J Clin Oncol* 2015;45:884-91.  
58  
59  
60



1  
2  
3  
4  
5  
6 422 Table 1. Items submitted to the National Cancer Registry in Japan by cancer care  
7  
8  
9 423 hospitals.

---

|                             |                                         |
|-----------------------------|-----------------------------------------|
| 1. Name of hospital         | 14. Date of diagnosis                   |
| 2. Patient's ID             | 15. Circumstance of cancer detection    |
| 3. Name (Hiragana)          | 16. Extension of disease (clinical)     |
| 4. Name (Kanji)             | 17. Extension of disease (pathological) |
| 5. Sex                      | 18. Surgery of primary site             |
| 6. Birth date               | 19. Laparo/thoroscopic surgery          |
| 7. Address of patients      | 20. Endoscopic surgery                  |
| 8. Laterality               | 21. Result of surgery                   |
| 9. Diagnosis (primary site) | 22. Radiation therapy                   |
| 10. Diagnosis (morphology)  | 23. Chemotherapy                        |
| 11. Diagnosis facility      | 24. Endocrinotherapy                    |
| 12. Treatment facility      | 25. Other treatment                     |
| 13. Basis of diagnosis      | 26. Date of death                       |

---

31 424  
32  
33  
34  
35  
36  
37  
38  
39  
40  
41  
42  
43  
44  
45  
46  
47  
48  
49  
50  
51  
52  
53  
54  
55  
56  
57  
58  
59  
60

425 Table 2. Primary tumor site according to International Classification of Diseases, 10th  
 426 Edition code used in the Monitoring of Cancer Incidence in Japan (MCIJ) project.<sup>41</sup>

|                                                           |                                                              |
|-----------------------------------------------------------|--------------------------------------------------------------|
| Any cancer (C00-C96, D00-D09)                             | Breast (C50, D05)                                            |
| Oral cavity and pharynx (C00-C14)                         | Uterus (C53-C55, D06)                                        |
| Esophagus (C15, D001)                                     | Cervix uteri (C53, D06)                                      |
| Stomach (C16)                                             | Corpus uteri (C54)                                           |
| Colon and rectum (C18-C20, D010-D012)                     | Ovary (C56)                                                  |
| Colon (C18 and D010)                                      | Prostate (C61)                                               |
| Rectum (C19-C20, D011-D012)                               | Bladder (C67, D090)                                          |
| Liver and intrahepatic bile ducts (C22)                   | Kidney and urinary organs (except bladder)<br>(C64-C66, C68) |
| Gallbladder and other parts of biliary tract<br>(C23-C24) | Brain and other parts of central nervous system<br>(C70-C72) |
| Pancreas (C25)                                            | Thyroid (C73)                                                |
| Larynx (C32)                                              | Malignant lymphoma (C81-C85, C96)                            |
| Lung and bronchus (C33-C34, D021-D022)                    | Multiple myeloma (C88, C90)                                  |
| Skin (C43-C44, D030-D049)                                 | Leukemia (C91-C95)                                           |

427

1  
2  
3  
4  
5  
6  
7  
8  
9  
10  
11  
12  
13  
14  
15  
16  
17  
18  
19  
20  
21  
22  
23  
24  
25  
26  
27  
28  
29  
30  
31  
32  
33  
34  
35  
36  
37  
38  
39  
40  
41  
42  
43  
44  
45  
46  
47  
48  
49  
50  
51  
52  
53  
54  
55  
56  
57  
58  
59  
60

428 **Figure legends**

429 Figure 1. The National Cancer Registry system in Japan.

430 Reporting of newly diagnosed cancer cases from 1 January 2016 onward has become a

431 legislative duty of hospitals in Japan. Information collected in each prefecture must be

432 registered in the National Cancer Registry (NCR) database and the National Cancer

433 Center follows up patients in the NCR by linking to mortality data based on national

434 death certificate files.

435

436

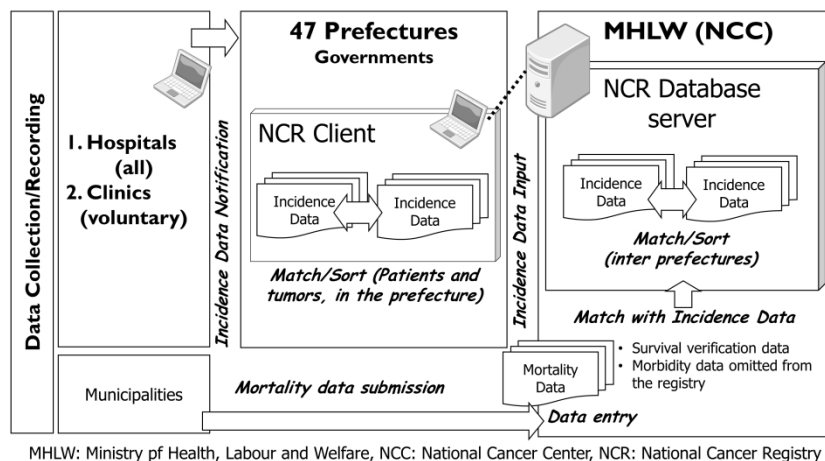

Figure 1. The National Cancer Registry system in Japan. Reporting of newly diagnosed cancer cases from 1 January 2016 onward has become a legislative duty of hospitals in Japan. Information collected in each prefecture must be registered in the National Cancer Registry (NCR) database and the National Cancer Center follows up patients in the NCR by linking to mortality data based on national death certificate files.

338x190mm (300 x 300 DPI)

## STROBE Statement—checklist of items that should be included in reports of observational studies

|                           | Item No | Recommendation                                                                                                                                                                                                                                                                                                                                                                                                                                                         | Page No |
|---------------------------|---------|------------------------------------------------------------------------------------------------------------------------------------------------------------------------------------------------------------------------------------------------------------------------------------------------------------------------------------------------------------------------------------------------------------------------------------------------------------------------|---------|
| <b>Title and abstract</b> | 1       | (a) Indicate the study's design with a commonly used term in the title or the abstract                                                                                                                                                                                                                                                                                                                                                                                 | 1, 3    |
|                           |         | (b) Provide in the abstract an informative and balanced summary of what was done and what was found                                                                                                                                                                                                                                                                                                                                                                    | 3       |
| <b>Introduction</b>       |         |                                                                                                                                                                                                                                                                                                                                                                                                                                                                        |         |
| Background/rationale      | 2       | Explain the scientific background and rationale for the investigation being reported                                                                                                                                                                                                                                                                                                                                                                                   | 4-8     |
| Objectives                | 3       | State specific objectives, including any prespecified hypotheses                                                                                                                                                                                                                                                                                                                                                                                                       | 8       |
| <b>Methods</b>            |         |                                                                                                                                                                                                                                                                                                                                                                                                                                                                        |         |
| Study design              | 4       | Present key elements of study design early in the paper                                                                                                                                                                                                                                                                                                                                                                                                                | 8       |
| Setting                   | 5       | Describe the setting, locations, and relevant dates, including periods of recruitment, exposure, follow-up, and data collection                                                                                                                                                                                                                                                                                                                                        | 10-11   |
| Participants              | 6       | (a) <i>Cohort study</i> —Give the eligibility criteria, and the sources and methods of selection of participants. Describe methods of follow-up<br><i>Case-control study</i> —Give the eligibility criteria, and the sources and methods of case ascertainment and control selection. Give the rationale for the choice of cases and controls<br><i>Cross-sectional study</i> —Give the eligibility criteria, and the sources and methods of selection of participants | 10-11   |
|                           |         | (b) <i>Cohort study</i> —For matched studies, give matching criteria and number of exposed and unexposed<br><i>Case-control study</i> —For matched studies, give matching criteria and the number of controls per case                                                                                                                                                                                                                                                 |         |
| Variables                 | 7       | Clearly define all outcomes, exposures, predictors, potential confounders, and effect modifiers. Give diagnostic criteria, if applicable                                                                                                                                                                                                                                                                                                                               | 11-14   |
| Data sources/measurement  | 8*      | For each variable of interest, give sources of data and details of methods of assessment (measurement). Describe comparability of assessment methods if there is more than one group                                                                                                                                                                                                                                                                                   | 10-11   |
| Bias                      | 9       | Describe any efforts to address potential sources of bias                                                                                                                                                                                                                                                                                                                                                                                                              |         |
| Study size                | 10      | Explain how the study size was arrived at                                                                                                                                                                                                                                                                                                                                                                                                                              | 10      |
| Quantitative variables    | 11      | Explain how quantitative variables were handled in the analyses. If applicable, describe which groupings were chosen and why                                                                                                                                                                                                                                                                                                                                           | 12-13   |
| Statistical methods       | 12      | (a) Describe all statistical methods, including those used to control for confounding                                                                                                                                                                                                                                                                                                                                                                                  | 11-14   |
|                           |         | (b) Describe any methods used to examine subgroups and interactions                                                                                                                                                                                                                                                                                                                                                                                                    | 12-14   |
|                           |         | (c) Explain how missing data were addressed                                                                                                                                                                                                                                                                                                                                                                                                                            |         |
|                           |         | (d) <i>Cohort study</i> —If applicable, explain how loss to follow-up was addressed<br><i>Case-control study</i> —If applicable, explain how matching of cases and controls was addressed<br><i>Cross-sectional study</i> —If applicable, describe analytical methods taking account of sampling strategy                                                                                                                                                              |         |
|                           |         | (e) Describe any sensitivity analyses                                                                                                                                                                                                                                                                                                                                                                                                                                  |         |

1  
2  
3  
4  
5  
6  
7  
8  
9  
10  
11  
12  
13  
14  
15  
16  
17  
18  
19  
20  
21  
22  
23  
24  
25  
26  
27  
28  
29  
30  
31  
32  
33  
34  
35  
36  
37  
38  
39  
40  
41  
42  
43  
44  
45  
46  
47  
48  
49  
50  
51  
52  
53  
54  
55  
56  
57  
58  
59  
60**Results**

|                   |     |                                                                                                                                                                                                              |       |
|-------------------|-----|--------------------------------------------------------------------------------------------------------------------------------------------------------------------------------------------------------------|-------|
| Participants      | 13* | (a) Report numbers of individuals at each stage of study—eg numbers potentially eligible, examined for eligibility, confirmed eligible, included in the study, completing follow-up, and analysed            |       |
|                   |     | (b) Give reasons for non-participation at each stage                                                                                                                                                         |       |
|                   |     | (c) Consider use of a flow diagram                                                                                                                                                                           |       |
| Descriptive data  | 14* | (a) Give characteristics of study participants (eg demographic, clinical, social) and information on exposures and potential confounders                                                                     |       |
|                   |     | (b) Indicate number of participants with missing data for each variable of interest                                                                                                                          |       |
|                   |     | (c) <i>Cohort study</i> —Summarise follow-up time (eg, average and total amount)                                                                                                                             |       |
| Outcome data      | 15* | <i>Cohort study</i> —Report numbers of outcome events or summary measures over time                                                                                                                          |       |
|                   |     | <i>Case-control study</i> —Report numbers in each exposure category, or summary measures of exposure                                                                                                         |       |
|                   |     | <i>Cross-sectional study</i> —Report numbers of outcome events or summary measures                                                                                                                           |       |
| Main results      | 16  | (a) Give unadjusted estimates and, if applicable, confounder-adjusted estimates and their precision (eg, 95% confidence interval). Make clear which confounders were adjusted for and why they were included |       |
|                   |     | (b) Report category boundaries when continuous variables were categorized                                                                                                                                    |       |
|                   |     | (c) If relevant, consider translating estimates of relative risk into absolute risk for a meaningful time period                                                                                             |       |
| Other analyses    | 17  | Report other analyses done—eg analyses of subgroups and interactions, and sensitivity analyses                                                                                                               |       |
| <b>Discussion</b> |     |                                                                                                                                                                                                              |       |
| Key results       | 18  | Summarise key results with reference to study objectives                                                                                                                                                     |       |
| Limitations       | 19  | Discuss limitations of the study, taking into account sources of potential bias or imprecision. Discuss both direction and magnitude of any potential bias                                                   | 15-16 |
| Interpretation    | 20  | Give a cautious overall interpretation of results considering objectives, limitations,                                                                                                                       |       |

|                          |    |                                                                                                                                                               |       |
|--------------------------|----|---------------------------------------------------------------------------------------------------------------------------------------------------------------|-------|
|                          |    | multiplicity of analyses, results from similar studies, and other relevant evidence                                                                           |       |
| Generalisability         | 21 | Discuss the generalisability (external validity) of the study results                                                                                         |       |
| <b>Other information</b> |    |                                                                                                                                                               |       |
| Funding                  | 22 | Give the source of funding and the role of the funders for the present study and, if applicable, for the original study on which the present article is based | 17-18 |

\*Give information separately for cases and controls in case-control studies and, if applicable, for exposed and unexposed groups in cohort and cross-sectional studies.

**Note:** An Explanation and Elaboration article discusses each checklist item and gives methodological background and published examples of transparent reporting. The STROBE checklist is best used in conjunction with this article (freely available on the Web sites of PLoS Medicine at <http://www.plosmedicine.org/>, Annals of Internal Medicine at <http://www.annals.org/>, and Epidemiology at <http://www.epidem.com/>). Information on the STROBE Initiative is available at [www.strobe-statement.org](http://www.strobe-statement.org).
